# Supplementary material
Source: MDPI journal article supplement (https://www.mdpi.com/2073-4395/10/9/1231)
Supplement: s2 [file s2]

## Sheet: Table_S1
Table S1 List of the 79 durum wheat cultivars analyzed in this study. From left to right we reported for each accession, year of release, geographical origin and pedigree. n.a. = not available.
Genotype	Year of release	Geographical origin	Pedigree
Achille	2006	n.a.	n.a.
Adamello	1985	Italy	Valforte/Turkis line 7112
Altar.84	1984	Mexico	Ruff/Flamingo, Mex//Mexicali 75/3/Shearwater
Amedeo	1987	Italy	Maristella/Capeiti
Ancomarzio	2003	Italy	Stotka//Altar84/Ald
Appio	1982	Italy	Cappelli//Gaviota/Yuma
Appulo	1973	Italy	Cappelli/Grifoni//Capeiti-8
Arcobaleno	1995	Italy/Spain	Chen/Altar 84
Ariosto	2005	Italy	Karim/GA7-X3//Duilio
Aureo	2009	n.a.	n.a.
Avispa	2001	Italy	n.a.
Baio	1998	Italy	Duilio/F21//G76
Capeiti.8	1940	Italy	Eiti 6/Cappelli
Cappelli	1915	Italy	Strampelli selection from “Jean Retifah”
Casanova	2003	Italy	Flavio/Syene//Duilio
Chiara	2003	Italy	Arcangelo/Fortore
Ciccio	1996	Italy	F6 Appulo/Valnova//F5 Valforte/Patrizio
Cirillo	1992	Italy	Jucci/Polesine//Creso/Montanari
Claudio	1998	Italy	CIMMYT's selection 35/Durango//IS1938/Grazia
Colosseo	1995	Italy	Mutant Mexa/Creso
Cosmodur	1992	France	Natural hybridization of D881 line
Creso	1974	Italy	Yaktana-54/Norin 10-B//2*Cappelli-63/3/3*Tehuacan-60/4/Capelli-B144
Duilio	1984	Italy	Cappelli//Anhinga/Flamingo, Mex
Dylan	2002	Italy	Neodur/Ulisse
Fortore	1995	Italy	Capeiti-8/Valforte
Giotto	1999	Italy	W.A 6518-2/GA547
Granizo	1992	Spain	Yel S/Shaw S
Grazia	1985	Italy	Leeds (M 6800127)/Valselva
Grecale	2002	Italy	S2/WB 881//Plinio/F22
Iride	1996	Italy	Altar 84/Ares
Italo	1993	Italy	Complex cross between Italian and Turkish genotypes
K26	2006	Italy	Spontaneuos mutant derived from Simeto/Colosseo
Karalis	n.a.	n.a.	n.a.
Kofa	n.a.	n.a.	n.a.
Kronos	1993	United States	APB MSFRS POP Sel (D03-12)
Langdon	1956	United States	Yuma (T. turgidum ssp durum)/Stewart (T. turgidum ssp. durum)//Carleton
Latino	1982	Italy	Cappelli/Anhinga//T. turgidum
Latinur	2004	France	n.a.
Lesina	1998	n.a.	n.a.
Levante	n.a.	n.a.	n.a.
Lloyd	1983	United States	Cando/Edmore
Maestrale	2004	Italy	Iride/Svevo
Meridiano	1999	Italy	Simeto/WB 881/Duilio/F21
Messapia	1982	Italy	Mex/Crane (SIB)//Tito
Mimmo	n.a.	n.a.	n.a.
Nefer	1996	France	164/Keops
Neodur	1987	France	184-7/Valdur//Edmore
Neolatino	2007	Italy	Latino/Trinakria//MG1433/4/Latino
Normanno	2002	Italy	Simeto/F22//L35
Ofanto	1990	Italy	Adamello/Appulo
Orfeo	2004	Italy	Creso/Simeto
Pedroso	1994	Spain	n.a.
Platani	1995	Italy	Valnova/Capeiti-8
PR22D89	2005	Italy	Ofanto/Duilio//Ixos
Preco	1995	Italy	Edmore/WPB881//Selected line 3
Primadur	1994	France	Blondur//2587-8-6/Leeds
Provenzal	1988	Italy	CIMMYT's selection (ATO’S CII3EIPUSOA 580)
Rusticano	1996	Italy	n.a.
Saadi	1995	France	IDSM72-3/711.8
San-Carlo	1996	Italy	Grazia/Degamit
Saragolla	2004	Italy	Iride/Line SPB 0114
Simeto	1988	Italy	Capeit-8/Valnova
Svevo	1996	Italy	CIMMYT's selection/Zenit
Tablur	2010	n.a.	n.a.
Tirex	2007	n.a.	n.a.
Tiziana	2001	Italy	Peleo/Neodur
Tresor	1984	Italy	Amber durum/S-22-80
Trinakria	1970	Italy	B-14/Capeiti-8
UC1113	2006	Canada	Kingfisher //Rossia/BD-1419/3/Mexi/CP/4/Waha/5/Yavaros-79
Valerio	2002	n.a.	n.a.
Valnova	1975	Italy	Giorgio-324//Senatore Cappelli/Yuma
Varano	1997	Italy	Capeiti-8/Creso//Creso/3/Valforte/Trinakria
Vesuvio	1996	Italy	Ofanto/Simeto
Virgilio	2002	France	Acalou/Shoula
Vitromax	1996	Italy/Spain	Turchia77/3/Jori/Anhunga//Flamingo, Mex
West-Bread-881	1982	United States	Complex cross of Ward, Wells, Cando, Waskana, Mexicali 75
PI94749	n.a.	n.a.	n.a.
Biensur	2000	n.a.	n.a.
Orobel	1999	Italy	Composite INRA/Gil Ble Dur

## Sheet: Table_S2
Table S2 List of SNPs, physically mapped on the 'Zavitan' genome (WEWSeq v.1.0), showing significant associations with yellow pigment content (YP) based on the CMLM method. Genetic position was indicated according to the tetraploid consensus map developed by Maccaferri et al., (2015). n.a. = not available.
SNP	Chromosome	Position (bp)	Transcript ID	Annotation	cM	P.value	R2 of model without SNP	R2 of model with SNP
	Wild Emmer genome
YP.16
BS00065170_51	1A	582636662	TRIDC1AG063120	Plant protein of unknown function (DUF247)	142.9	7.7881e-08	0.273197	-2.18363
Kukri_c40953_658	2A	91415342	TRIDC2AG017750	Pre-mRNA-splicing factor SYF1	96	7.7881e-08	0.273197	-2.18363
Kukri_c67546_279	2A	91421659	TRIDC2AG017760	Sulfotransferase	96	7.7881e-08	0.273197	-2.18363
RFL_Contig1385_326	2B	147198649	TRIDC2BG021670	RNA-binding protein 39	73.5	7.7881e-08	0.273197	-2.18363
RAC875_c25375_236	3B	140912116	TRIDC3BG020330	UDP-Glycosyltransferase superfamily protein	63.8	7.7881e-08	0.273197	-2.18363
Kukri_c7804_2504	3B	467024111	TRIDC3BG042750	chloride channel E	n.a.	7.7881e-08	0.273197	-2.18363
IACX3426	3B	698180277	TRIDC3BG065780	unknown function	129.6	7.7881e-08	0.273197	-2.18363
Ku_c46571_2583	3B	701422737	TRIDC3BG066320	dicer-like 1	130.1	7.7881e-08	0.273197	-2.18363
Kukri_c13345_481	3B	751717521	TRIDC3BG072410	Mitochondrial substrate carrier family protein	144.8	7.7881e-08	0.273197	-2.18363
BS00060666_51	3B	751945425	TRIDC3BG072450	Homeobox protein LUMINIDEPENDENS	146.4	7.7881e-08	0.273197	-2.18363
BS00105878_51	3B	762885605	TRIDC3BG074270	unknown function	n.a.	7.7881e-08	0.273197	-2.18363
CAP12_rep_c4571_181	4B	11639988	TRIDC4BG003020	undescribed protein	12.1	7.7881e-08	0.273197	-2.18363
Kukri_rep_c79943_189	4B	541798790	TRIDC4BG046050	undescribed protein	69.3	7.7881e-08	0.273197	-2.18363
IAAV5683	5A	518614625	TRIDC5AG046200	40S ribosomal protein S25-4	114.3	3.77652e-06	0.273197	-0.137269
Excalibur_c3165_730	5A	590819414	TRIDC5AG058620	Sulfhydryl oxidase 1	n.a.	7.7881e-08	0.273197	-2.18363
IACX5390	5A	600810891	TRIDC5AG060400	unknown function	136	7.7881e-08	0.273197	-2.18363
wsnp_Ku_c11060_18147688	7B	119625169	TRIDC7BG015000	RNA-binding protein 47	n.a.	7.7881e-08	0.273197	-2.18363
YP.17
GENE-1214_288	1A	349690319	TRIDC1AG029170	Armadillo repeat-containing protein 7	43	8.95512e-05	0.101975	-0.623878
BobWhite_c11946_277	1A	519222554	TRIDC1AG048560	Signal recognition particle 54 kDa protein 2	87.3	1.74243e-08	0.101975	-0.207163
BS00065170_51	1A	582636662	TRIDC1AG063120	Plant protein of unknown function (DUF247)	n.a.	8.95512e-05	0.101975	-0.623878
BS00093078_51	1B	2401305	TRIDC1BG000570	Pco110845	n.a.	1.09492e-06	0.101975	-1.12557
BS00035690_51	1B	138929471	TRIDC1BG017610	Glucan 1,3-beta-glucosidase A	34.6	8.95512e-05	0.101975	-0.623878
RAC875_c24317_1015	1B	677849202	TRIDC1BG072460	Lysine-specific demethylase 5B	155	1.74243e-08	0.101975	-0.207163
tplb0049h18_1121	1B	679799982	TRIDC1BG072870	Protein kinase superfamily protein	155	1.74243e-08	0.101975	-0.207163
Kukri_c40953_658	2A	91415342	TRIDC2AG017750	Pre-mRNA-splicing factor SYF1	96	8.95512e-05	0.101975	-0.623878
Kukri_c67546_279	2A	91421659	TRIDC2AG017760	Sulfotransferase	96	8.95512e-05	0.101975	-0.623878
RFL_Contig1385_326	2B	147198649	TRIDC2BG021670	RNA-binding protein 39	73.5	8.95512e-05	0.101975	-0.623878
RAC875_rep_c113120_326	2B	627889454	TRIDC2BG064010	Protein argonaute 2	137	1.74243e-08	0.101975	-0.207163
RAC875_c25375_236	3B	140912116	TRIDC3BG020330	UDP-Glycosyltransferase superfamily protein	63.8	8.95512e-05	0.101975	-0.623878
Kukri_c7804_2504	3B	467024111	TRIDC3BG042750	chloride channel E	n.a.	8.95512e-05	0.101975	-0.623878
IACX3426	3B	698180277	TRIDC3BG065780	unknown function	129.6	8.95512e-05	0.101975	-0.623878
Ku_c46571_2583	3B	701422737	TRIDC3BG066320	dicer-like 1	130.1	8.95512e-05	0.101975	-0.623878
Kukri_c13345_481	3B	751717521	TRIDC3BG072410	Mitochondrial substrate carrier family protein	144.8	8.95512e-05	0.101975	-0.623878
BS00060666_51	3B	751945425	TRIDC3BG072450	Homeobox protein LUMINIDEPENDENS	146.4	8.95512e-05	0.101975	-0.623878
BS00105878_51	3B	762885605	TRIDC3BG074270	unknown function	n.a.	8.95512e-05	0.101975	-0.623878
CAP12_rep_c4571_181	4B	11639988	TRIDC4BG003020	undescribed protein	12.1	8.95512e-05	0.101975	-0.623878
Kukri_rep_c79943_189	4B	541798790	TRIDC4BG046050	undescribed protein	69.3	8.95512e-05	0.101975	-0.623878
IAAV5683	5A	518614625	TRIDC5AG046200	40S ribosomal protein S25-4	114.3	8.95512e-05	0.101975	-0.623878
Excalibur_c3165_730	5A	590819414	TRIDC5AG058620	Sulfhydryl oxidase 1	n.a.	8.95512e-05	0.101975	-0.623878
IACX5390	5A	600810891	TRIDC5AG060400	unknown function	136	8.95512e-05	0.101975	-0.623878
BS00040992_51	7A	564522395	TRIDC7AG054320	nudix hydrolase homolog 2	n.a.	1.59206e-06	0.101975	-0.405281
wsnp_Ku_c11060_18147688	7B	119625169	TRIDC7BG015000	RNA-binding protein 47	58.4	8.95512e-05	0.101975	-0.623878

## Sheet: Table_S3
Table S3 List of SNPs physically mapped on the 'Svevo' genome (RefSeq Rel. 1.0) showing significant associations with gluten protein (gliadins and glutenins) composition and peptides triggering the adaptive (immunogenic peptides, IP) and innate (toxic peptides, TP) immune response in CD patients. n.a. = not available.
Trait	SNP	Chr	Pos	Transcript	Annotation
Protein component
GLY.Mean.16	BobWhite_c19155_246	5A	496193834	TRITD5Av1G182260	Protein stay-green, chloroplastic
	wsnp_Ex_c4026_7281501	5A	496413091	TRITD5Av1G182370	Pseudo response regulator
	BS00003958_51	6B	698263449	TRITD6Bv1G229050	Protein LAZY 1 G
HMW-GS/LMW-GS.16	Tdurum_contig42729_433	6A	34599632	TRITD6Av1G015760	Protein DETOXIFICATION
	Tdurum_contig42729_380	6A	34599685	TRITD6Av1G015760	Protein DETOXIFICATION
	Tdurum_contig78006_158	6A	451603439	TRITD6Av1G155600	Fatty acid oxidation complex subunit alpha
	Tdurum_contig76709_195	6A	452009903	TRITD6Av1G155830	alpha/beta-Hydrolases superfamily protein
	BS00036878_51	6A	452642718	TRITD6Av1G156120	Protein kinase family protein
	IAAV7349	6A	34445896	TRITD6Av1G015630	ARC6
HMW-GS/LMW-GS.17	GENE-1214_288	1A	341566480	TRITD1Av1G126190	Armadillo repeat-containing protein
	BS00065170_51	1A	574962626	TRITD1Av1G225560	Mitochondrial transcription termination factor family protein G
	BS00035690_51	1A	84204944	TRITD1Av1G037520	Glucan 1,3-beta-glucosidase
	Kukri_c40953_658	2A	87154607	TRITD2Av1G040220	Pre-mRNA-splicing factor SYF1
	Kukri_c67546_279	2A	87160926	TRITD2Av1G040230	Sulfotransferase
	RFL_Contig1385_326	2A	87808335	TRITD2Av1G040470	RNA binding protein
	RAC875_c25375_236	3A	95703030	TRITD3Av1G043260	Glycosyltransferase
	Kukri_c7804_2504	3A	477551539	TRITD3Av1G169960	Chloride channel protein
	IACX3426	3A	648739551	TRITD3Av1G238100	BTB/POZ and TAZ domain protein
	Ku_c46571_2583	3A	650018735	TRITD3Av1G238910	Endoribonuclease Dicer-like protein 3
	Kukri_c13345_481	3A	682975621	TRITD3Av1G254550	MADS-box transcription factor
	BS00060666_51	3A	683123523	TRITD3Av1G254620	Methyl esterase
	BS00105878_51	3A	689043690	TRITD3Av1G258300	Tetraspanin family protein, putative G
	CAP12_rep_c4571_181	4B	11767058	n.a.	n.a.
	Kukri_rep_c79943_189	1B	153704770	TRITD1Bv1G056310	Ubiquitin carboxyl-terminal hydrolase
	IAAV5683	5A	501333599	TRITD5Av1G185200	Protein PAT1 1 G
	Excalibur_c3165_730	5A	558113686	TRITD5Av1G208510	BTB/POZ domain-containing protein
	IACX5390	5A	566862200	TRITD5Av1G212580	Actin-depolymerizing factor
	wsnp_Ku_c11060_18147688	7A	152146139	TRITD7Av1G065710	RNA binding protein, putative
Gli + Glu.16	BobWhite_c19155_246	5A	496193834	TRITD5Av1G182260	Protein stay-green, chloroplastic
	wsnp_Ex_c4026_7281501	5A	496413091	TRITD5Av1G182370	Pseudo response regulator
Epitopes
IP2.16	BS00041355_51	1B	482901667	TRITD1Bv1G155370	transmembrane protein, putative (DUF1218)
IP2.16	wsnp_JD_c6331_7499060	1A	496621315	TRITD1Av1G187060	P-loop containing nucleoside triphosphate hydrolases superfamily protein G
IP2.16	Excalibur_rep_c66322_448	1B	541398320	n.a.	n.a.
IP2.16	Excalibur_rep_c107047_605	1A	531035673	TRITD1Av1G203800	Choline kinase
IP2.16	Tdurum_contig96049_200	1A	531167728	TRITD1Av1G203870	Microtubule associated protein family protein G
IP2.16	RAC875_c34012_983	7A	715571054	TRITD7Av1G275430	1,4-alpha-glucan branching enzyme
IP3.16	BobWhite_c20073_382	1A	576972373	TRITD1Av1G226860	Cytoplasmic membrane protein G
IP3.16	RFL_Contig5290_1493	2B	198190161	TRITD2Bv1G075810	Transferase
IP3.16	BobWhite_rep_c66361_594	4A	724985869	n.a.	n.a.
IP3.16	BobWhite_c22086_444	6A	7427304	TRITD6Av1G003270	Protein transport protein SEC16B-like protein
IP3.16	RAC875_c17559_3102	6A	59807520	TRITD6Av1G025210	Endoglucanase 11 G
IP3.16	Excalibur_c92249_102	6A	586319869	TRITD6Av1G212000	Translation initiation factor IF-2, putative isoform 2 G
IP3.16	Kukri_c39759_102	7A	576827098	TRITD7Av1G216130	Carboxypeptidase
TPT.16	BobWhite_c20073_382	1A	576972373	TRITD1Av1G226860	Cytoplasmic membrane protein G
TPT.16	CAP8_rep_c8022_270	1A	11944089	TRITD1Av1G005910	Pumilio-like protein
TPT.16	Excalibur_c92249_102	6A	586319869	TRITD6Av1G212000	Translation initiation factor IF-2, putative isoform 2 G

## Sheet: Table_S4
Table S4. Pearson's rank correlation coefficients between pairs of traits measured in 2015/2016 (A) and 2016/2017 (B) cropping seasons. Significant two sided p-values are reported below each rectangular correlation matrix.
(A) 2015/2016 cropping season	Gli.16	HMW.16	LMW.16	Gli_plus_Glu.16	Gli_Glu_ratio.16	HMW_LMW_ratio.16	GPC.16	YP.16	IP2.16	IP3.16	IPT.16	TPT.16	HD.16	YOR
Gli.16	1	0.291475	-0.0946595	0.873605	0.832248	0.376448	-0.0996916	-0.0839499	-0.00429995	-0.0393538	0.0115977	0.102533	0.0433522	-0.0484434
HMW.16		1	0.460666	0.651889	-0.208087	0.561927	-0.137533	0.0425238	0.0320942	0.10983	0.131015	0.0438404	0.257351	-0.147251
LMW.16			1	0.346057	-0.561023	-0.471949	-0.130132	0.0799088	0.233586	0.287108	0.233805	0.0622374	0.106069	0.169682
Gli_plus_Glu.16				1	0.459624	0.324071	-0.158239	-0.0331394	0.0752765	0.0834019	0.115604	0.114649	0.137836	-0.0304793
Gli_Glu_ratio.16					1	0.315018	-0.00419731	-0.118351	-0.0974864	-0.171081	-0.112412	0.0622219	-0.0799047	-0.0487037
HMW_LMW_ratio.16						1	-0.00712573	-0.0392475	-0.171655	-0.141833	-0.0713257	-0.000684558	0.163846	-0.312439
GPC.16							1	0.00628641	0.366857	0.304979	0.345223	0.229945	-0.105583	-0.261019
YP.16								1	-0.0335334	-0.0785387	-0.0814266	0.0115674	0.0891211	0.320633
IP2.16									1	0.821616	0.874431	0.670272	-0.0486194	-0.316609
IP3.16										1	0.943448	0.745914	-0.0754086	-0.207421
IPT.16											1	0.76898	-0.0553544	-0.305041
TPT.16												1	-0.0424564	-0.210225
HD.16													1	-0.227895
YOR														1
Gli.16	0	0.345917	0.156842	5.91264e-05	2.66932e-05	0.0202882	0.171042	0.180093	0.175479	0.136673	0.205342	0.388885	0.969145	0.670876
HMW.16		0	0.157688	0.0112588	0.604727	0.0589612	0.11199	0.58533	0.485735	0.612701	0.652443	0.43	0.135061	0.422839
LMW.16			0	0.823187	0.00256361	0.0298695	0.512942	0.736666	0.33516	0.232394	0.339481	0.738731	0.758995	0.517609
Gli_plus_Glu.16				0	0.0488721	0.0594281	0.046013	0.203121	0.267406	0.273102	0.335305	0.367982	0.599651	0.689901
Gli_Glu_ratio.16					0	0.0411067	0.600156	0.288679	0.212575	0.138405	0.215438	0.536405	0.665202	0.740945
HMW_LMW_ratio.16						0	0.485118	0.394444	0.131579	0.121775	0.210147	0.335881	0.314339	0.155254
GPC.16							0	0.490271	0.0166914	0.0354173	0.0251785	0.045284	0.25761	0.0694808
YP.16								0	0.253391	0.243718	0.188954	0.231749	0.900196	0.0351834
IP2.16									0	1.37996e-09	9.38471e-11	2.5483e-06	0.325453	0.0473114
IP3.16										0	1.14766e-12	1.31035e-06	0.29453	0.0849605
IPT.16											0	3.48758e-07	0.329879	0.0383238
TPT.16												0	0.268228	0.0503376
HD.16													0	0.350752
YOR														0
(B) 2016/2017 cropping season	Gli.17	HMW.17	LMW.17	Gli_plus_Glu.17	Gli_Glu_ratio.17	HMW_LMW_ratio.17	GPC.17	YP.17	IP2.17	IP3.17	IPT.17	TPT.17	HD.17	YOR
Gli.17	1	0.385416	0.0523072	0.888963	0.816911	0.116628	0.112538	-0.0890359	0.0922603	0.398158	0.373799	0.176562	0.0951241	-0.326336
HMW.17		1	0.148119	0.527998	0.12009	0.1717	0.323133	-0.0176495	0.357649	0.441253	0.489299	0.370543	0.031897	-0.197892
LMW.17			1	0.481376	-0.499686	-0.936389	0.116343	-0.0112378	0.0574615	-0.133784	0.00478638	0.0286431	0.256592	0.063285
Gli_plus_Glu.17				1	0.470225	-0.268888	0.189414	-0.0793241	0.153983	0.334237	0.379699	0.211944	0.18853	-0.267884
Gli_Glu_ratio.17					1	0.577522	-0.0026708	-0.0701724	-0.00742949	0.391367	0.272909	0.117259	-0.0517139	-0.292867
HMW_LMW_ratio.17						1	0.00540315	0.00253839	0.0418287	0.302982	0.164749	0.0967605	-0.222388	-0.136696
GPC.17							1	0.525747	0.336131	0.206567	0.368736	0.214269	0.272505	-0.161082
YP.17								1	-0.0212237	0.0203512	0.0422415	0.0345342	0.0485331	0.103584
IP2.17									1	0.444827	0.68318	0.509397	0.0631851	-0.231943
IP3.17										1	0.846772	0.612165	-0.00106904	-0.206016
IPT.17											1	0.726563	0.125969	-0.273638
TPT.17												1	0.124605	-0.0448791
HD.17													1	-0.197573
YOR														1
Gli17	0	0.0732143	0.832534	8.42323e-05	0.000382751	0.483118	0.652633	0.09298	0.855024	0.0914899	0.185101	0.685054	0.950677	0.00762871
HMW.17		0	0.72355	0.0293706	0.394232	0.691794	0.376216	0.243974	0.0387932	0.0171171	0.00820058	0.0552871	0.842812	0.0274375
LMW.17			0	0.10878	0.0176811	3.54522e-09	0.556635	0.960523	0.920365	0.244662	0.688912	0.831188	0.079318	0.695628
Gli_plus_Glu.17				0	0.152453	0.313993	0.985615	0.12097	0.66619	0.294199	0.239355	0.653462	0.464127	0.0303861
Gli_Glu_ratio.17					0	0.00506518	0.419072	0.224491	0.924535	0.056151	0.269762	0.751143	0.332049	0.0348334
HMW_LMW_ratio.17						0	0.679698	0.807564	0.790814	0.085115	0.356567	0.561091	0.0786393	0.3619
GPC.17							0	0.0188478	0.170222	0.746539	0.319177	0.556313	0.247532	0.246676
YP.17								0	0.539038	0.281042	0.364122	0.422605	0.952233	0.432283
IP2.17									0	0.00868824	0.000103988	0.000851746	0.921729	0.084308
IP3.17										0	7.6142e-07	0.000521721	0.46691	0.0276942
IPT.17											0	2.25883e-05	0.938984	0.0153407
TPT.17												0	0.934451	0.21631
HD.17													0	0.314456
YOR														0

## Sheet: Table_S5
Table S5 List of positional candidate genes identified within the LD-decay (+/- 4 Mb) interval from the significant MTAs. Transcript nomenclature and annotation derive from 'Zavitan' genome (WEWSeq v.1.0).
MTA	Chromosome	Transcript ID	Start (bp)	End (bp)	Annotation
	chr1A	TRIDC1AG028890	345697894	345698299	undescribed protein
		TRIDC1AG028880	345697894	345698299	undescribed protein
		TRIDC1AG028900	345925033	345925561	Histone H2B.2
		TRIDC1AG028910	345985207	345988152	undescribed protein
		TRIDC1AG028930	346019425	346019985	undescribed protein
		TRIDC1AG028920	346018859	346022196	Leucine-rich repeat (LRR) family protein
		TRIDC1AG028940	346026543	346027303	undescribed protein
		TRIDC1AG028950	346218161	346218850	RING/FYVE/PHD zinc finger superfamily protein
		TRIDC1AG028960	346921250	346921696	3-hydroxyisobutyryl-CoA hydrolase 1
		TRIDC1AG028970	346977803	346980617	AT-hook motif nuclear-localized protein 1
		TRIDC1AG028980	346980364	346980631	undescribed protein
		TRIDC1AG028990	346980817	346981061	undescribed protein
		TRIDC1AG029000	347107693	347112307	unknown function
		TRIDC1AG029010	347115829	347116049	undescribed protein
		TRIDC1AG029020	347117634	347118407	Dynamin-related protein 3B
		TRIDC1AG029030	347267044	347267334	undescribed protein
		TRIDC1AG029040	347469220	347469921	undescribed protein
		TRIDC1AG029050	347597393	347599545	pfkB-like carbohydrate kinase family protein
		TRIDC1AG029060	347601018	347601467	AMME syndrome candidate gene 1 protein
		TRIDC1AG029070	347603921	347605177	undescribed protein
		TRIDC1AG029080	348232065	348232934	unknown function
		TRIDC1AG029090	348260646	348263116	BEST Arabidopsis thaliana protein match is: RPM1 interacting protein 13 .
		TRIDC1AG029100	348468055	348468825	Abscisic acid receptor PYR1
		TRIDC1AG029110	348471016	348471253	undescribed protein
		TRIDC1AG029120	349099462	349100631	Mitochondrial substrate carrier family protein
		TRIDC1AG029140	349395136	349395467	undescribed protein
		TRIDC1AG029130	349396233	349396666	unknown function
		TRIDC1AG029150	349408999	349410935	60S ribosomal export protein NMD3
		TRIDC1AG029160	349415396	349418098	Nuclear control of ATPase protein 2
		TRIDC1AG029170	349689682	349690161	Armadillo repeat-containing protein 7
GENE-1214_288			345690319
		TRIDC1AG028880	345697894	345698299	undescribed protein
		TRIDC1AG028900	345925033	345925561	Histone H2B.2
		TRIDC1AG028920	346018859	346022196	Leucine-rich repeat (LRR) family protein
		TRIDC1AG028950	346218161	346218850	RING/FYVE/PHD zinc finger superfamily protein
		TRIDC1AG028960	346921250	346921696	3-hydroxyisobutyryl-CoA hydrolase 1
		TRIDC1AG028970	346977803	346980617	AT-hook motif nuclear-localized protein 1
		TRIDC1AG029000	347107693	347112307	unknown function
		TRIDC1AG029020	347117634	347118407	Dynamin-related protein 3B
		TRIDC1AG029050	347597393	347599545	pfkB-like carbohydrate kinase family protein
		TRIDC1AG029060	347601018	347601467	AMME syndrome candidate gene 1 protein
		TRIDC1AG029090	348260646	348263116	BEST Arabidopsis thaliana protein match is: RPM1 interacting protein 13 .
		TRIDC1AG029100	348468055	348468825	Abscisic acid receptor PYR1
		TRIDC1AG029120	349099462	349100631	Mitochondrial substrate carrier family protein
		TRIDC1AG029150	349408999	349410935	60S ribosomal export protein NMD3
		TRIDC1AG029160	349415396	349418098	Nuclear control of ATPase protein 2
		TRIDC1AG029170	349689682	349690161	Armadillo repeat-containing protein 7
		TRIDC1AG029180	349693623	349694369	RING/U-box superfamily protein
		TRIDC1AG029190	349695115	349698311	Replication factor C subunit 5
		TRIDC1AG029200	350161837	350162449	PLATZ transcription factor family protein
		TRIDC1AG029220	350473059	350474999	Ubiquitin carboxyl-terminal hydrolase 21
		TRIDC1AG029250	350495891	350498564	ADP-ribosylation factor GTPase-activating protein 2
		TRIDC1AG029270	350628052	350628583	F-box family-3
		TRIDC1AG029280	351119435	351121668	Basic helix-loop-helix protein A
		TRIDC1AG029290	351773706	351774466	DnaJ homolog subfamily C member 13
		TRIDC1AG029320	352139503	352141683	Homeobox-leucine zipper protein family
		TRIDC1AG029360	352458709	352461224	Plastid lipid-associated protein 3, chloroplastic
		TRIDC1AG029370	352463163	352465393	ARM repeat superfamily protein
		TRIDC1AG029380	353003080	353003956	calmodulin 5
		TRIDC1AG029420	353069276	353069912	NADH-ubiquinone oxidoreductase 12 kDa subunit, mitochondrial
		TRIDC1AG029430	353073214	353074697	Inositol-tetrakisphosphate 1-kinase 5
		TRIDC1AG029450	353199361	353200282	Tetratricopeptide repeat (TPR)-like superfamily protein
		TRIDC1AG029490	353334963	353338607	Endoplasmic reticulum-based factor for assembly of V-ATPase
		TRIDC1AG029510	353592650	353594033	Plant protein of unknown function (DUF827)
		TRIDC1AG029530	353614900	353617828	Retrotransposon protein, putative, unclassified
		TRIDC1AG029560	353624859	353625370	dihydroflavonol 4-reductase-like1
		TRIDC1AG062290	578689644	578690480	Late embryogenesis abundant protein
		TRIDC1AG062300	578693678	578694652	undescribed protein
		TRIDC1AG062310	578706605	578707212	UDP-Glycosyltransferase superfamily protein
		TRIDC1AG062320	578844177	578844456	unknown function
		TRIDC1AG062340	578971608	578973914	S-type anion channel SLAH2
		TRIDC1AG062360	579095567	579096064	hAT dimerisation domain-containing protein / transposase-related
		TRIDC1AG062370	579096400	579096981	Zinc finger MYM-type protein 1
		TRIDC1AG062420	579442505	579444955	Protein ABIL1
		TRIDC1AG062430	579445793	579448824	calcium-dependent protein kinase 6
		TRIDC1AG062460	579557228	579558853	FAD-binding Berberine family protein
		TRIDC1AG062470	579589452	579589969	Nuclear transcription factor Y subunit B-2
		TRIDC1AG062560	579735114	579736886	Protein kinase family protein
		TRIDC1AG062570	579737753	579741798	Mitochondrial substrate carrier family protein
		TRIDC1AG062580	579967850	579970299	putative indole-3-acetic acid-amido synthetase GH3.9
		TRIDC1AG062600	580108031	580111297	extra-large G-protein 1
		TRIDC1AG062610	580129288	580131280	Transmembrane amino acid transporter family protein
		TRIDC1AG062640	580178362	580182456	Transducin family protein / WD-40 repeat family protein
		TRIDC1AG062650	580268902	580270185	Disease resistance protein RPP13
		TRIDC1AG062660	580387824	580390059	Disease resistance protein
		TRIDC1AG062670	580644428	580645461	Bifunctional inhibitor/lipid-transfer protein/seed storage 2S albumin superfamily protein
		TRIDC1AG062730	580994361	580995492	sugar transporter 1
		TRIDC1AG062740	581007101	581007805	B-block binding subunit of TFIIIC
		TRIDC1AG062780	581300979	581301814	RNA polymerase sigma-B factor
		TRIDC1AG062800	581407677	581410283	Pentatricopeptide repeat-containing protein
		TRIDC1AG062810	581436972	581439672	Protein phosphatase 2C family protein
		TRIDC1AG062820	581451060	581452298	CTP synthase family protein
		TRIDC1AG062830	581456399	581460527	plastid transcriptionally active 14
		TRIDC1AG062850	581604498	581610431	Leucine-rich repeat receptor-like protein kinase family protein
		TRIDC1AG062860	581682340	581683592	TPR repeat-containing thioredoxin TTL1
		TRIDC1AG062900	581740873	581745065	Tesmin/TSO1-like CXC domain-containing protein
		TRIDC1AG062920	582038076	582040680	Acyl-protein thioesterase 2
		TRIDC1AG062940	582132055	582133715	tryptophan synthase alpha chain
		TRIDC1AG062950	582134760	582135547	Csu868(Trp)
		TRIDC1AG063000	582252469	582253834	Structural maintenance of chromosomes protein 3
		TRIDC1AG063070	582540856	582546722	Paired amphipathic helix protein Sin3-like 3
		TRIDC1AG063080	582549095	582551492	Paired amphipathic helix protein Sin3-like 5
		TRIDC1AG063090	582582800	582583461	ATP-dependent zinc metalloprotease FtsH 2
BS00065170_51				582636662
		TRIDC1AG063120	582634662	582636895	Plant protein of unknown function (DUF247)
		TRIDC1AG063170	582794999	582798577	Lysine-specific demethylase 5B
		TRIDC1AG063180	583046907	583056569	Zinc finger protein 2C
		TRIDC1AG063200	583175754	583177122	Protein of Unknown Function (DUF239)
		TRIDC1AG063220	583225904	583229539	Trimethylguanosine synthase
		TRIDC1AG063240	583283742	583309216	RNase P Rpr2/Rpp21 subunit domain protein
		TRIDC1AG063260	583391368	583394213	E3 ubiquitin-protein ligase MARCH6
		TRIDC1AG063280	583491119	583492056	ATP synthase subunit a
		TRIDC1AG063310	583521757	583523435	ATP synthase subunit alpha, chloroplastic
		TRIDC1AG063320	583525377	583526116	serine-type endopeptidase inhibitors
		TRIDC1AG063330	583533618	583534335	Pathogen-related protein
		TRIDC1AG063340	583588383	583590649	Phosphoglucan phosphatase LSF1, chloroplastic
		TRIDC1AG063350	583852321	583854365	RNA polymerase sigma-C factor
		TRIDC1AG063360	583887096	583888285	F-box/RNI-like superfamily protein
		TRIDC1AG063380	583970136	583974813	receptor kinase 2
	chr1B	TRIDC1BG017400	136744945	136745929	Histidine--tRNA ligase
		TRIDC1BG017410	136989600	136990612	Desiccation-related protein PCC13-62
		TRIDC1BG017420	136996049	136996934	40S ribosomal protein S4
		TRIDC1BG017430	137014080	137014410	undescribed protein
		TRIDC1BG017440	137199267	137203433	ATPase family gene 2 protein
		TRIDC1BG017450	137630612	137633641	undescribed protein
		TRIDC1BG017460	137639898	137640910	undescribed protein
		TRIDC1BG017470	137668135	137668283	undescribed protein
		TRIDC1BG017490	137850645	137852019	undescribed protein
		TRIDC1BG017480	137850417	137852054	undescribed protein
		TRIDC1BG017500	137861527	137862135	undescribed protein
		TRIDC1BG017510	138124313	138127089	Pre-rRNA-processing protein TSR2, conserved region
		TRIDC1BG017520	138127635	138127999	Pre-rRNA-processing protein TSR2, conserved region
		TRIDC1BG017530	138292165	138293366	nudix hydrolase homolog 14
		TRIDC1BG017540	138397068	138397607	undescribed protein
		TRIDC1BG017550	138397421	138397612	undescribed protein
		TRIDC1BG017560	138401770	138403258	undescribed protein
		TRIDC1BG017570	138401749	138403375	undescribed protein
		TRIDC1BG017580	138759520	138763526	undescribed protein
		TRIDC1BG017590	138865441	138866822	unknown function
		TRIDC1BG017600	138865495	138870621	undescribed protein
BS00035690_51				138929471
		TRIDC1BG017610	138924703	138929897	Glucan 1,3-beta-glucosidase A
		TRIDC1BG017620	139120341	139121525	FAR1-related sequence 3
		TRIDC1BG017630	139288084	139289348	BTB/POZ domain-containing protein
		TRIDC1BG017650	139300443	139301743	Rubber elongation factor protein (REF)
		TRIDC1BG017660	139360732	139364528	Translocase of chloroplast 159, chloroplastic
		TRIDC1BG017670	139365467	139365921	undescribed protein
		TRIDC1BG017680	139472020	139474190	Myb transcription factor
		TRIDC1BG017690	139477997	139479582	unknown function
		TRIDC1BG017700	139480545	139483167	Retrotransposon protein, putative, unclassified
		TRIDC1BG045270	492477139	492478783	Octicosapeptide/Phox/Bem1p family protein
		TRIDC1BG045280	492523932	492526799	FAR1-related sequence 5
		TRIDC1BG045290	492613208	492615502	General transcription factor 2-related zinc finger protein
		TRIDC1BG045300	492656766	492658254	Beta-1,3-galactosyltransferase 7
		TRIDC1BG045320	492659869	492660365	undescribed protein
		TRIDC1BG045350	492710856	492711732	Splicing factor 3B subunit 4
		TRIDC1BG045370	492894515	492895127	Poly [ADP-ribose] polymerase 2-A
		TRIDC1BG045380	492895340	492896456	DNAJ homologue 3
		TRIDC1BG045390	492970620	492975359	Adenine nucleotide alpha hydrolases-like superfamily protein
		TRIDC1BG045410	493108525	493110452	Potassium channel AKT2
		TRIDC1BG045470	493529047	493529327	Far-red impaired responsive (FAR1) family protein
		TRIDC1BG045480	493531402	493532154	unknown function
		TRIDC1BG045500	493562300	493563426	Isoflavone reductase-like protein
		TRIDC1BG045510	493625016	493625725	Sec14p-like phosphatidylinositol transfer family protein
		TRIDC1BG045520	493803721	493804251	Carboxymethylenebutenolidase homolog
		TRIDC1BG045530	493811513	493813414	C2 calcium/lipid-binding plant phosphoribosyltransferase family protein
		TRIDC1BG045550	494084128	494084972	myb domain protein 4
		TRIDC1BG045560	494149610	494150249	alpha/beta-Hydrolases superfamily protein
		TRIDC1BG045570	494224640	494227161	Deoxycytidine kinase
		TRIDC1BG045580	494308333	494315303	Protein of unknown function (DUF668)
		TRIDC1BG045590	494316110	494318192	Ribosome biogenesis GTPase A
		TRIDC1BG045600	494508375	494508931	Amidophosphoribosyltransferase
		TRIDC1BG045610	494511093	494512199	Protein NRT1/ PTR FAMILY 5.10
		TRIDC1BG045680	494766320	494767072	HXXXD-type acyl-transferase family protein
		TRIDC1BG045690	494775493	494776210	2-oxoglutarate (2OG) and Fe(II)-dependent oxygenase superfamily protein
		TRIDC1BG045710	494788790	494790018	Gibberellin-regulated family protein
		TRIDC1BG045730	494893049	494897671	Abhydrolase domain-containing protein 1
		TRIDC1BG045740	494900169	494901819	Transmembrane protein 18
		TRIDC1BG045750	494975174	494978167	Coiled-coil domain-containing protein 47
		TRIDC1BG045760	495275711	495279203	aspartate aminotransferase
		TRIDC1BG045800	495348616	495350070	Subtilisin-like protease SBT3.17
		TRIDC1BG045820	495388281	495389139	Protein kinase superfamily protein
		TRIDC1BG045830	495635856	495636298	30S ribosomal protein S11
		TRIDC1BG045840	495684911	495685548	Protein of unknown function (DUF1218)
		TRIDC1BG045860	495701293	495705419	Pol polyprotein
		TRIDC1BG045880	495869253	495869825	RAPT-4
		TRIDC1BG045920			unknown function
BS00041355_51			496196589
		TRIDC1BG045960	496580791	496582886	Subtilisin-like protease
		TRIDC1BG045990	496702022	496703095	proliferating cell nuclear antigen 2
		TRIDC1BG046020	497109419	497111246	receptor kinase 2
		TRIDC1BG046030	497162500	497164945	Protein S-acyltransferase 8
		TRIDC1BG046040	497297531	497298169	Ethylene-responsive transcription factor 1
		TRIDC1BG046060	497303184	497306541	like COV 2
		TRIDC1BG046080	497327658	497328319	polypyrimidine tract-binding protein 3
		TRIDC1BG046100	497341396	497344230	Protein YIPF
		TRIDC1BG046110	497496001	497538700	signal peptide peptidase
		TRIDC1BG046140	497545552	497546366	Sec-independent protein translocase protein TatC
		TRIDC1BG046170	497629025	497629970	G-box binding factor 4
		TRIDC1BG046240	497778806	497780022	ATP-binding cassette transporter
		TRIDC1BG046290	498051067	498051645	Tubby-like F-box protein 8
		TRIDC1BG046300	498165939	498167572	myb-like transcription factor family protein
		TRIDC1BG046330	498361741	498362234	U6 snRNA-associated Sm-like protein LSm3
		TRIDC1BG046340	498364111	498365164	Inorganic pyrophosphatase
		TRIDC1BG046370	498412239	498413628	Fructose-1,6-bisphosphatase class 1
		TRIDC1BG046380	498424394	498425107	Histone superfamily protein
		TRIDC1BG046400	498894449	498895022	Retrotransposon protein, putative, unclassified
		TRIDC1BG046410	498895535	498896520	actin 7
		TRIDC1BG046450	499375833	499377477	Pentatricopeptide repeat-containing protein
		TRIDC1BG046460	499456326	499457696	U-box domain-containing protein
		TRIDC1BG046510	500023346	500024284	DOF zinc finger protein 1
		TRIDC1BG052160	549900076	549901627	Galactosylgalactosylxylosylprotein 3-beta-glucuronosyltransferase 1
		TRIDC1BG052130	549889184	550004057	CYCLIN B1;3
		TRIDC1BG052170	550035663	550036442	BURP domain-containing protein
		TRIDC1BG052180	550037341	550043542	ABC transporter C family member 3
		TRIDC1BG052190	550106668	550108147	UDP-Glycosyltransferase superfamily protein
		TRIDC1BG052200	550320337	550321445	nodulin MtN21 /EamA-like transporter family protein
		TRIDC1BG052220	550515539	550515754	undescribed protein
		TRIDC1BG052210	550515838	550517308	Formimidoyltransferase-cyclodeaminase
		TRIDC1BG052260	551009725	551010283	Cytochrome P450 superfamily protein
		TRIDC1BG052300	551112584	551114043	Aldehyde dehydrogenase family 2 member C4
		TRIDC1BG052310	551358879	551363289	Nuclear transcription factor Y subunit C-9
		TRIDC1BG052320	551363871	551364610	Cysteine proteinase inhibitor
		TRIDC1BG052350	551969966	551970946	Cytochrome c-type biogenesis CcmH-like mitochondrial protein
		TRIDC1BG052370	552075990	552076669	unknown function
		TRIDC1BG052380	552102267	552103514	Nucleotide-sugar transporter family protein
		TRIDC1BG052390	552343894	552344218	Pectin lyase-like superfamily protein
		TRIDC1BG052410	552394252	552395204	EID1-like F-box protein 3
		TRIDC1BG052420	552399897	552401211	Phosphatidylinositol-glycan biosynthesis class X protein
		TRIDC1BG052450	552755459	552760385	Transcription elongation factor Spt6
		TRIDC1BG052460	552975425	552977946	Serine/threonine-protein kinase
		TRIDC1BG052490	553069332	553069861	RING/U-box superfamily protein
		TRIDC1BG052510	553298610	553299997	Zinc finger protein 830
		TRIDC1BG052520	553303189	553303860	Basic-leucine zipper (bZIP) transcription factor family protein
		TRIDC1BG052530	553397282	553398172	Zeta-carotene desaturase
wsnp_JD_c6331_7499060				553899486
		TRIDC1BG052680	553894334	553904347	SOSS complex subunit B homolog
		TRIDC1BG052720	554433323	554437268	calcium-transporting ATPase, putative
		TRIDC1BG052730	554443871	554444972	60S ribosomal protein L37
		TRIDC1BG052760	554477210	554477798	Glycerol-3-phosphate dehydrogenase [NAD(P)+]
		TRIDC1BG052790	554760640	554763342	Cellulose-synthase-like C5
		TRIDC1BG052800	554769391	554771977	Glucan endo-1,3-beta-glucosidase
		TRIDC1BG052860	556106100	556108038	hydroxyproline-rich glycoprotein family protein
		TRIDC1BG052870	556108772	556110534	Phosphoglycerate kinase family protein
		TRIDC1BG052880	556125084	556126833	Mitochondrial transcription termination factor family protein
		TRIDC1BG052890	556131077	556131556	ubiquitin 13
		TRIDC1BG052910	556214603	556215632	zinc-finger protein 10
		TRIDC1BG052930	556264988	556265497	Deoxyuridine 5'-triphosphate nucleotidohydrolase
		TRIDC1BG052940	556290663	556294375	dentin sialophosphoprotein-related
		TRIDC1BG052960	556343036	556344340	metacaspase 4
		TRIDC1BG053010	556822276	556825307	protein kinase family protein
		TRIDC1BG053050	556969961	556973870	Structural maintenance of chromosomes protein 4
		TRIDC1BG053060	556981881	556982230	Ethylene-responsive transcription factor 12
		TRIDC1BG053090	557633665	557634713	Ethylene-responsive transcription factor 8
		TRIDC1BG056020	580466351	580466732	Cellulose-synthase-like C5
		TRIDC1BG056030	580468954	580469203	undescribed protein
		TRIDC1BG056040	580493867	580498661	BSD domain-containing protein
		TRIDC1BG056050	580663295	580663528	unknown function
		TRIDC1BG056090	580891426	580892214	CLAVATA3/ESR-RELATED 12
		TRIDC1BG056110	580908766	580913143	H4/H2A histone acetyltransferase complex
		TRIDC1BG056120	581125266	581126797	Carbohydrate-binding X8 domain superfamily protein
		TRIDC1BG056130	581742694	581742974	Protein of unknown function (DUF581)
		TRIDC1BG056140	582018171	582019313	TCP family transcription factor 4
		TRIDC1BG056150	582317296	582317742	calcium-transporting ATPase, putative
		TRIDC1BG056200	582541210	582546079	Mitochondrial import inner membrane translocase subunit TIM50
		TRIDC1BG056210	582547955	582551433	cleavage stimulating factor 64
		TRIDC1BG056220	582638955	582639232	Magnesium transporter NIPA2
		TRIDC1BG056240	582644501	582645981	50S ribosomal protein L33
		TRIDC1BG056230	582644493	582646466	Nucleotide-diphospho-sugar transferase family protein
		TRIDC1BG056250	582701378	582702226	RAC-like GTP binding protein 5
		TRIDC1BG056260	582903212	582905780	proline iminopeptidase
		TRIDC1BG056290	583112891	583114312	serine/threonine protein kinase 1
		TRIDC1BG056320	583122151	583126801	Tubby-like F-box protein 9
		TRIDC1BG056330	583474909	583475860	DOF zinc finger protein 2
		TRIDC1BG056340	583617158	583617705	gibberellin 2-oxidase
		TRIDC1BG056370	583966626	583968323	Cytochrome P450 superfamily protein
		TRIDC1BG056380	584241036	584241580	ORMDL family protein
		TRIDC1BG056400	584473026	584473366	auxin response factor 4
BobWhite_c20073_382				584479982
		TRIDC1BG056410	584519397	584521068	O-methyltransferase family protein
		TRIDC1BG056440	584696442	584697071	O-methyltransferase ZRP4
		TRIDC1BG056490	584796131	584800474	Disease resistance protein
		TRIDC1BG056500	584832426	584833017	Chalcone synthase
		TRIDC1BG056530	584844040	584847514	Transducin family protein / WD-40 repeat family protein
		TRIDC1BG056550	584917974	584919242	Orphans transcription factor
		TRIDC1BG056560	584963813	584966382	receptor kinase 2
		TRIDC1BG056570	584972678	584973387	Ankyrin repeat family protein
		TRIDC1BG056660	586666166	586669100	vascular plant one zinc finger protein
		TRIDC1BG056670	586670306	586672749	Eukaryotic translation initiation factor 2 subunit 3
		TRIDC1BG056710	586829215	586830599	28 kDa heat- and acid-stable phosphoprotein
		TRIDC1BG056730	586868794	586869996	rRNA N-glycosidase
		TRIDC1BG056750	587409316	587410788	UDP-Glycosyltransferase superfamily protein
		TRIDC1BG056770	587478099	587479921	receptor kinase 1
		TRIDC1BG056780	587487566	587490102	Ras-related protein Rab-7a
		TRIDC1BG056830	588079111	588084122	trehalose phosphate synthase
		TRIDC1BG056840	588085352	588087955	gamma-glutamyl hydrolase 1
		TRIDC1BG056850	588198157	588198409	Non-symbiotic hemoglobin
		TRIDC1BG056860	588347233	588348225	RNA ligase/cyclic nucleotide phosphodiesterase family protein
		TRIDC1BG056870	588348791	588349308	Protein FLOWERING LOCUS T
		TRIDC1BG059530	605756288	605756735	ralf-like 33
		TRIDC1BG059540	606068829	606069455	NADH-quinone oxidoreductase subunit B
		TRIDC1BG059550	606109928	606110634	undescribed protein
		TRIDC1BG059590	606162657	606201040	30S ribosomal protein S3
		TRIDC1BG059610	606223241	606223631	Mitochondrial ATP synthase subunit G protein
		TRIDC1BG059620	606226817	606229268	ATP-dependent Clp protease ATP-binding subunit ClpX
		TRIDC1BG059630	606228616	606230969	Pentatricopeptide repeat-containing protein
		TRIDC1BG059640	606272670	606273470	MATE efflux family protein
		TRIDC1BG059650	606341302	606341519	Acid phosphatase/vanadium-dependent haloperoxidase-related protein
		TRIDC1BG059660	606347814	606348364	small ubiquitin-like modifier 2
		TRIDC1BG059700	606468573	606470010	calcineurin B-like protein 8
		TRIDC1BG059710	606700446	606701992	calcineurin B-like protein 1
		TRIDC1BG059740	607417794	607419928	Heavy metal transport/detoxification superfamily protein
		TRIDC1BG059750	607421255	607427246	CASC3/Barentsz eIF4AIII binding
		TRIDC1BG059770	607449146	607449673	Protein of unknown function (DUF674)
		TRIDC1BG059780	607482715	607485213	Protein O-linked-mannose beta-1,4-N-acetylglucosaminyltransferase 2
		TRIDC1BG059840	607883666	607884241	Betaine aldehyde dehydrogenase 2
		TRIDC1BG059850	607966025	607966483	ATP-dependent DNA helicase PIF1
		TRIDC1BG059860	607988071	607988415	E3 ubiquitin-protein ligase MIB2
		TRIDC1BG059890	608244183	608244443	Cytochrome P450 superfamily protein
		TRIDC1BG059900	608818341	608818864	unknown function
		TRIDC1BG059910	608947858	608948791	rapid alkalinization factor 23
		TRIDC1BG059980	609482520	609484957	Serine/threonine-protein kinase
		TRIDC1BG060000	609557772	609558474	DNA-damage-repair/toleration protein (DRT102)
		TRIDC1BG060010	609613000	609622190	Protein kinase superfamily protein
		TRIDC1BG060050	609654750	609655971	Glucan endo-1,3-beta-glucosidase 8
		TRIDC1BG060060	609658098	609661022	Choline/ethanolamine kinase
Excalibur_rep_c107047_605				609661176
		TRIDC1BG060070	609840911	609841144	30S ribosomal protein S8, chloroplastic
		TRIDC1BG060090	610020267	610023256	HXXXD-type acyl-transferase family protein
		TRIDC1BG060120	610152053	610154812	TSA: Wollemia nobilis Ref_Wollemi_Transcript_18801_2421 transcribed RNA sequence
		TRIDC1BG060140	610519253	610521414	6-phosphogluconate dehydrogenase, decarboxylating 1
		TRIDC1BG060160	610684505	610685044	Type I inositol polyphosphate 5-phosphatase 1
		TRIDC1BG060200	610693621	610696359	30S ribosomal protein S1
		TRIDC1BG060210	610928075	610931210	IQ-domain 31
		TRIDC1BG060220	610933640	610936185	Mitochondrial outer membrane protein porin 2
		TRIDC1BG060230	610940627	610941448	myb-like transcription factor family protein
		TRIDC1BG060270	611133429	611134159	Myb/SANT-like DNA-binding domain protein
		TRIDC1BG060280	611163885	611165128	AP2-like ethylene-responsive transcription factor
		TRIDC1BG060300	611336689	611337471	aldehyde dehydrogenase 12A1
		TRIDC1BG060310	611347549	611348797	Ras-related protein Rab-7A
		TRIDC1BG060330	611774996	611775619	WRKY DNA-binding protein 51
		TRIDC1BG060340	611782993	611785638	WD-40 repeat family protein
	chr2A	TRIDC2AG006700	30124016	30124546	TTF-type zinc finger protein with HAT dimerisation domain
		TRIDC2AG006710	30137610	30139726	Transitional endoplasmic reticulum ATPase
		TRIDC2AG006720	30147455	30149316	THO complex subunit 4D
		TRIDC2AG006730	30392496	30393729	2-oxoglutarate (2OG) and Fe(II)-dependent oxygenase superfamily protein
		TRIDC2AG006740	30413105	30413820	BTB/POZ domain-containing protein
		TRIDC2AG006750	30420011	30423141	unknown function
		TRIDC2AG006760	30527446	30530028	Protein transport protein sec1
		TRIDC2AG006770	30533971	30534236	Cleavage and polyadenylation specificity factor subunit 1
		TRIDC2AG006780	30545506	30546133	undescribed protein
		TRIDC2AG006790	30607105	30608043	6-phosphogluconate dehydrogenase family protein
		TRIDC2AG006800	30609140	30609633	Nucleotide-diphospho-sugar transferase family protein
		TRIDC2AG006820	30639016	30639810	undescribed protein
		TRIDC2AG006810	30640829	30643223	WD repeat-containing protein 25
		TRIDC2AG006830	30647131	30648684	WD-40 repeat family protein
		TRIDC2AG006840	30651479	30652034	Endo-1,4-beta-xylanase Z
		TRIDC2AG006850	30684945	30685707	Proline-rich protein
		TRIDC2AG006860	30693875	30695046	Proline-rich protein
		TRIDC2AG006870	30697295	30698114	Proline-rich protein
		TRIDC2AG006880	30804218	30804610	undescribed protein
		TRIDC2AG006890	30812572	30813281	Proline-rich protein
		TRIDC2AG006900	30912064	30912823	Proline-rich protein
		TRIDC2AG006910	30963190	30964308	Proline-rich protein
		TRIDC2AG006920	31012948	31013878	Proline-rich protein
		TRIDC2AG006930	31045415	31046556	Proline-rich protein
		TRIDC2AG006940	31058538	31060114	NAC domain protein,
		TRIDC2AG006950	31062778	31064336	NAC domain protein,
		TRIDC2AG006970	31066598	31067481	undescribed protein
		TRIDC2AG006960	31065088	31070794	NAC domain protein,
		TRIDC2AG006980	31072811	31075670	Pentatricopeptide repeat-containing protein
		TRIDC2AG007000	31086403	31087260	undescribed protein
		TRIDC2AG006990	31086120	31090665	Lupus brain antigen 1-like protein
		TRIDC2AG007010	31219328	31219908	undescribed protein
		TRIDC2AG007020	31361013	31361840	undescribed protein
		TRIDC2AG007030	31816958	31817602	Myb family transcription factor family protein
		TRIDC2AG007040	31822551	31824647	undescribed protein
		TRIDC2AG007050	31832713	31833964	Glutamyl-tRNA(Gln) amidotransferase subunit A
		TRIDC2AG007060	32245607	32249447	unknown function
		TRIDC2AG007070	32253374	32253855	undescribed protein
		TRIDC2AG007080	32254094	32254473	undescribed protein
		TRIDC2AG007090	32259856	32260334	RING/U-box superfamily protein
		TRIDC2AG007100	32266882	32268760	Cytochrome P450 superfamily protein
		TRIDC2AG007110	32281745	32282606	RING/FYVE/PHD zinc finger superfamily protein
		TRIDC2AG007120	32494273	32503832	ubiquitin-protein ligase 4
		TRIDC2AG007130	32548426	32551740	unknown function
		TRIDC2AG007140	32666997	32668088	Heavy metal transport/detoxification superfamily protein
		TRIDC2AG007160	32681144	32681955	undescribed protein
		TRIDC2AG007150	32685075	32688630	Prostaglandin E synthase 2
		TRIDC2AG007180	32955087	32955488	undescribed protein
		TRIDC2AG007170	32949023	32959416	mRNA capping enzyme family protein
		TRIDC2AG007190	32961834	32962169	RING/U-box superfamily protein
		TRIDC2AG007200	32983065	33027404	2-oxoglutarate (2OG) and Fe(II)-dependent oxygenase superfamily protein
		TRIDC2AG007210	33030512	33034256	2-oxoglutarate (2OG) and Fe(II)-dependent oxygenase superfamily protein
		TRIDC2AG007220	33113908	33114403	Aquaporin-like superfamily protein
		TRIDC2AG007230	33136821	33139769	2-oxoglutarate (2OG) and Fe(II)-dependent oxygenase superfamily protein
		TRIDC2AG007240	33242725	33246355	Sigma factor SigB regulation protein RsbQ
		TRIDC2AG007250	33247829	33249401	unknown function
		TRIDC2AG007260	33269525	33269725	Sugar transporter SWEET
		TRIDC2AG007270	33307693	33309893	40S ribosomal protein S6
		TRIDC2AG007290	33312850	33313417	undescribed protein
		TRIDC2AG007300	33313886	33314313	undescribed protein
		TRIDC2AG007280	33312558	33315338	undescribed protein
		TRIDC2AG007310	33316266	33316929	undescribed protein
		TRIDC2AG007320	33319475	33320737	40S ribosomal protein S6
		TRIDC2AG007330	33327047	33329109	Rho GTPase-activating protein 2
		TRIDC2AG007340	33356940	33358022	Alcohol dehydrogenase
		TRIDC2AG007350	33377873	33378955	Alcohol dehydrogenase
		TRIDC2AG007360	33409809	33410739	expansin 11
		TRIDC2AG007370	33438236	33441750	Ribulose bisphosphate carboxylase small chain, chloroplastic
		TRIDC2AG007380	33477271	33478259	Ribulose bisphosphate carboxylase small chain, chloroplastic
		TRIDC2AG007390	33506325	33507758	undescribed protein
CAP8_rep_c8022_270				33508142
		TRIDC2AG007450	33559052	33560262	unknown function
		TRIDC2AG007460	33560440	33562859	Eukaryotic aspartyl protease family protein
		TRIDC2AG007470	33566423	33569203	Thioredoxin superfamily protein
		TRIDC2AG007480	33571596	33572821	Leucine-rich receptor-like protein kinase family protein
		TRIDC2AG007500	33589551	33592836	Leucine-rich repeat receptor-like protein kinase family protein
		TRIDC2AG007520	33622296	33624126	receptor-like protein kinase 1
		TRIDC2AG007530	33628935	33629742	50S ribosomal protein L30
		TRIDC2AG007540	33639164	33639722	myb domain protein 36
	chr2B	TRIDC2AG017430	88430574	88430923	Mitochondrial inner membrane translocase complex, subunit Tim44-related protein
		TRIDC2AG017480	88744526	88745911	BSD domain-containing protein
		TRIDC2AG017490	88748710	88750106	UDP-Glycosyltransferase superfamily protein
		TRIDC2AG017500	89093484	89094758	undescribed protein
		TRIDC2AG017520	89098728	89100138	unknown function
		TRIDC2AG017530	89107036	89111237	DNA repair protein-related
		TRIDC2AG017580	89793228	89794094	Basic-leucine zipper (bZIP) transcription factor family protein
		TRIDC2AG017600	89902485	89903424	Protein phosphatase 2C family protein
		TRIDC2AG017610	89959117	89962606	SAC3/GANP/Nin1/mts3/eIF-3 p25 family
		TRIDC2AG017620	90426706	90429003	Zinc transporter 5
		TRIDC2AG017650	90509007	90509783	Endonuclease/exonuclease/phosphatase family protein
		TRIDC2AG017670	90516552	90517217	Protein of unknown function (DUF679)
		TRIDC2AG017680	90961611	90968742	Transformation/transcription domain-associated protein
		TRIDC2AG017690	90988921	90989649	Glycoprotein membrane precursor GPI-anchored
		TRIDC2AG017730	91390466	91392185	F-box/RNI-like/FBD-like domains-containing protein
		TRIDC2AG017740	91393234	91394460	Cytochrome P450 superfamily protein
Kukri_c40953_658				91415342
		TRIDC2AG017750	91417907	91418900	Pre-mRNA-splicing factor SYF1
		TRIDC2AG017760	91419381	91420234	Sulfotransferase
		TRIDC2AG017780	91428795	91429264	Ubiquitin-like superfamily protein
		TRIDC2AG017790	91546239	91549990	bZIP transcription factor 17
		TRIDC2AG017800	91550570	91553435	ATP synthase mitochondrial F1 complex assembly factor 2
		TRIDC2AG017810	91655134	91655348	Acetyl esterase
		TRIDC2AG017830	91818505	91819689	alpha/beta-Hydrolases superfamily protein
		TRIDC2AG017840	91826097	91827545	Zinc transporter 8
		TRIDC2AG017880	92194499	92195457	RNA-binding protein 39
		TRIDC2AG017890	92204916	92205515	anthranilate synthase 2
		TRIDC2AG017900	92255646	92256094	Transposon protein, putative, CACTA, En/Spm sub-class
		TRIDC2AG017940	92271457	92274400	FAR1-related sequence 5
		TRIDC2AG017950	92279586	92280063	BTB-POZ and MATH domain 1
		TRIDC2AG017970	92518990	92519733	B3 domain-containing protein
		TRIDC2AG017990	92654844	92656797	gamma carbonic anhydrase 2
		TRIDC2AG018000	92657489	92658272	Glutathione S-transferase family protein
		TRIDC2AG018010	92696577	92700588	C2 domain-containing protein
		TRIDC2AG018020	93024197	93028054	Stomatal closure-related actin-binding protein 1
		TRIDC2AG018030	93114496	93115135	Cold shock-like protein
		TRIDC2AG018080	93296804	93297434	Transcription elongation factor (TFIIS) family protein
		TRIDC2AG018090	93553214	93554119	Peroxidase superfamily protein
		TRIDC2AG018140	93741638	93742854	DNA/RNA helicase protein
		TRIDC2AG018150	93940552	93942616	Pentatricopeptide repeat-containing protein
		TRIDC2BG021500	146186712	146191031	Cytochrome P450 superfamily protein
		TRIDC2BG021510	146198045	146207666	Pre-mRNA-splicing factor SYF1
		TRIDC2BG021520	146209329	146210791	Sulfotransferase
		TRIDC2BG021530	146212583	146213100	undescribed protein
		TRIDC2BG021540	146221927	146222395	Ubiquitin-like superfamily protein
		TRIDC2BG021550	146371688	146372250	bZIP transcription factor 17
		TRIDC2BG021560	146375295	146377877	ATP synthase mitochondrial F1 complex assembly factor 2
		TRIDC2BG021570	146381408	146381954	alpha/beta-Hydrolases superfamily protein
		TRIDC2BG021590	146717688	146718791	Acetyl esterase
		TRIDC2BG021610	146760616	146762407	Zinc transporter 8
		TRIDC2BG021620	146785540	146790943	unknown function
RFL_Contig1385_326				147198649
		TRIDC2BG021670	147198046	147198738	RNA-binding protein 39
		TRIDC2BG021700	147296150	147296720	BTB-POZ and MATH domain 1
		TRIDC2BG021720	147499977	147501092	B3 domain-containing protein
		TRIDC2BG021740	147540307	147540571	cytochrome P450, family 71, subfamily A, polypeptide 25
		TRIDC2BG021760	147650232	147652186	gamma carbonic anhydrase 2
		TRIDC2BG021780	147909728	147912381	C2 domain-containing protein
		TRIDC2BG021790	148196678	148200141	Stomatal closure-related actin-binding protein 1
		TRIDC2BG021800	148475525	148476050	Cold shock-like protein
		TRIDC2BG021820	148642172	148642828	Transcription elongation factor (TFIIS) family protein
		TRIDC2BG021830	148719757	148721022	Peroxidase superfamily protein
		TRIDC2BG021920	148911210	148915181	DNA/RNA helicase protein
		TRIDC2BG021930	149047982	149050046	Pentatricopeptide repeat-containing protein
		TRIDC2BG021990	149521791	149522211	Trafficking protein particle complex subunit 3
		TRIDC2BG022010	149661059	149663029	ATP-dependent RNA helicase DBP2
		TRIDC2BG022020	149677772	149679065	GDSL esterase/lipase
		TRIDC2BG028150	203242861	203244420	fatty acid desaturase 6
		TRIDC2BG028160	203252612	203253443	undescribed protein
		TRIDC2BG028180	203255628	203256872	formin homolog 6
		TRIDC2BG028200	203268811	203271370	Pentatricopeptide repeat-containing protein
		TRIDC2BG028210	203273405	203276289	Interferon-related developmental regulator 1
		TRIDC2BG028240	203531273	203534052	unknown function
		TRIDC2BG028320	203907784	203908397	BTB/POZ domain-containing protein
		TRIDC2BG028330	203978837	203979162	regulatory particle triple-A ATPase 3
		TRIDC2BG028340	203979566	203981686	Protein of unknown function (DUF300)
		TRIDC2BG028370	204085881	204086373	Eukaryotic peptide chain release factor subunit 1
		TRIDC2BG028380	204152006	204153060	Retrotransposon protein, putative, unclassified
		TRIDC2BG028390	204179755	204180035	U-box domain-containing protein 4
		TRIDC2BG028400	204331543	204335630	GDSL esterase/lipase
		TRIDC2BG028420	204584533	204588289	SUMO-activating enzyme 2
		TRIDC2BG028430	204594479	204597313	effector of transcription2
		TRIDC2BG028460	204737795	204738280	Lipase class 3-related protein
		TRIDC2BG028470	204824819	204825936	Vesicle-associated membrane protein-associated protein A
		TRIDC2BG028490	205149969	205151756	GRAS family transcription factor
		TRIDC2BG028500	205358063	205359288	Nucleotide-diphospho-sugar transferase family protein
		TRIDC2BG028510	205610731	205611273	ZCW7
		TRIDC2BG028530	205963483	205964770	HXXXD-type acyl-transferase family protein
RFL_Contig5290_1493				205965316
		TRIDC2BG028550	206152495	206155597	NADH dehydrogenase [ubiquinone] iron-sulfur protein 4, mitochondrial
		TRIDC2BG028560	206158748	206159259	Seed dormancy protein
		TRIDC2BG028600	206469985	206470877	Bifunctional inhibitor/lipid-transfer protein/seed storage 2S albumin superfamily protein
		TRIDC2BG028660	206992448	206994883	Amino-acid acetyltransferase
		TRIDC2BG028680	207086581	207087530	Calcium-binding protein 39-like
		TRIDC2BG028700	207377067	207378297	Calcium-dependent lipid-binding (CaLB domain) family protein
		TRIDC2BG028750	208025472	208026388	aldehyde dehydrogenase 11A3
	chr3B	TRIDC3BG019810	136418550	136424021	aspartate aminotransferase
		TRIDC3BG019820	136517077	136526603	ABC transporter G family member 31
		TRIDC3BG019830	136664511	136665331	undescribed protein
		TRIDC3BG019850	136804421	136805840	gibberellin 3-oxidase 1
		TRIDC3BG019870	137248412	137258386	Ubiquitin carboxyl-terminal hydrolase 14
		TRIDC3BG019880	137289378	137289632	ABC transporter C family member 8
		TRIDC3BG019900	137562061	137563598	WD-40 repeat family protein
		TRIDC3BG019920	137974744	137975696	2-oxoglutarate-dependent dioxygenase AOP3
		TRIDC3BG019930	137977027	137977880	Glucan endo-1,3-beta-glucosidase 8
		TRIDC3BG019940	138047267	138048251	unknown function
		TRIDC3BG019950	138129082	138129477	BES1/BZR1 homolog 1
		TRIDC3BG020020	138511382	138513587	F-box family protein
		TRIDC3BG020030	138994538	138995484	Myb/SANT-like DNA-binding domain protein
		TRIDC3BG020040	139001757	139002020	Transposon protein, putative, CACTA, En/Spm sub-class
		TRIDC3BG020070	139406459	139425845	Phototropic-responsive NPH3 family protein
		TRIDC3BG020100	139490266	139492202	FAR1-related sequence 12
		TRIDC3BG020160	140129966	140130643	Prefoldin subunit 6
		TRIDC3BG020170	140137106	140138311	tRNA (guanine(10)-N2)-methyltransferase homolog
		TRIDC3BG020180	140268737	140271168	UDP-Glycosyltransferase superfamily protein
		TRIDC3BG020190	140271384	140273702	Pentatricopeptide repeat-containing protein
		TRIDC3BG020200	140278332	140280892	DNA endonuclease RBBP8
		TRIDC3BG020230	140432659	140434502	Two-component response regulator ARR18
		TRIDC3BG020240	140498716	140501967	Protein of unknown function (DUF2921)
		TRIDC3BG020280	140775231	140777181	tonoplast dicarboxylate transporter
		TRIDC3BG020310	140845119	140846676	chloride channel C
RAC875_c25375_236				140912116
		TRIDC3BG020510	141811875	141815112	Nucleolar complex protein 4
		TRIDC3BG020530	141852839	141854346	Ankyrin-3
		TRIDC3BG020550	141858847	141859947	ankyrin repeat family protein
		TRIDC3BG020560	141861346	141863108	Boron transporter 4
		TRIDC3BG042510	465045722	465054419	Anoctamin-like protein
		TRIDC3BG042520	465054744	465056801	unknown function
		TRIDC3BG042530	465057625	465058700	60S ribosomal protein L28-1
		TRIDC3BG042540	465119480	465120659	Dihydrolipoyllysine-residue acetyltransferase component 4 of pyruvate dehydrogenase complex, chloroplastic
		TRIDC3BG042550	465481469	465481803	undescribed protein
		TRIDC3BG042580	465670218	465673826	MAPK activating protein-like
		TRIDC3BG042590	466098171	466098492	Activated RNA polymerase II transcriptional coactivator p15
		TRIDC3BG042620	466312639	466314066	basic helix-loop-helix (bHLH) DNA-binding superfamily protein
		TRIDC3BG042630	466392507	466394130	proliferating cell nuclear antigen 2
		TRIDC3BG042640	466542675	466543307	Protein PLASTID TRANSCRIPTIONALLY ACTIVE 7
		TRIDC3BG042660	466663394	466664239	Late embryogenesis abundant protein, group 3
		TRIDC3BG042680	466664722	466665390	germin-like protein 4
		TRIDC3BG042730	466978376	466979217	GDSL esterase/lipase
		TRIDC3BG042750	467019362	467021101	chloride channel E
Kukri_c7804_2504				467024111
		TRIDC3BG042760	467195827	467196038	D111/G-patch domain-containing protein
		TRIDC3BG042770	467200324	467201209	ABC transporter G family member 19
		TRIDC3BG042790	467207549	467208807	Kelch repeat-containing F-box family protein
		TRIDC3BG042860	467645291	467646838	high affinity nitrate transporter 2.6
		TRIDC3BG042880	467995791	467999522	AP-1 complex subunit mu-2
		TRIDC3BG042900	468005444	468005877	FPPS
		TRIDC3BG042890	468004447	468007155	Farnesyl pyrophosphate synthase
		TRIDC3BG042920	468186423	468188046	RING/U-box superfamily protein
		TRIDC3BG042930	468362325	468363037	myb domain protein 86
		TRIDC3BG065700	696513171	696515963	TBC1 domain family member 13
		TRIDC3BG065710	696892165	696895604	Protein terminal ear1 homolog
		TRIDC3BG065720	697559882	697561484	LRR receptor-like serine/threonine-protein kinase EFR
		TRIDC3BG065730	697573559	697574057	BTB/POZ and TAZ domain-containing protein 1
		TRIDC3BG065740	697863249	697863779	undescribed protein
IACX3426				698180277
		TRIDC3BG065780	698185321	698185645	unknown function
		TRIDC3BG065820	698879623	698880997	Leucine-rich repeat receptor-like protein kinase family protein
		TRIDC3BG065830	698884018	698885124	Pentatricopeptide repeat-containing protein
		TRIDC3BG065840	699007677	699008306	Chalcone synthase
		TRIDC3BG065850	699011593	699013207	Transposon Ty1-H Gag-Pol polyprotein
		TRIDC3BG065860	699026995	699032186	O-methyltransferase 1
		TRIDC3BG065900	699245359	699248751	Cysteine proteinases superfamily protein
		TRIDC3BG065930	699309962	699310317	Endo-1,3(4)-beta-glucanase 1
		TRIDC3BG065940	699315664	699317371	Magnesium transporter MRS2-F
		TRIDC3BG065950	699400900	699407052	telomere repeat binding factor 1
		TRIDC3BG072230	751056257	751057703	unknown function
		TRIDC3BG072250	751103741	751107990	Kelch-like protein 17
		TRIDC3BG072270	751151477	751157612	ankyrin repeat family protein
		TRIDC3BG072280	751158323	751159820	Myosin-2 heavy chain
		TRIDC3BG072290	751456500	751457101	undescribed protein
		TRIDC3BG072330	751476271	751476744	undescribed protein
		TRIDC3BG072400	751704340	751705444	Calcium-dependent lipid-binding (CaLB domain) family protein
		TRIDC3BG072410	751712431	751717179	Mitochondrial substrate carrier family protein
Kukri_c13345_481				751717521
		TRIDC3BG072440	751896667	751897835	Cell differentiation, Rcd1-like protein
		TRIDC3BG072450	751939528	751942613	Homeobox protein LUMINIDEPENDENS
		TRIDC3BG072480	752210014	752210439	SAUR-like auxin-responsive protein family
		TRIDC3BG072490	752213026	752213774	PsbP-like protein 1
		TRIDC3BG072510	752213629	752214538	methyl esterase 3
		TRIDC3BG072540	752274126	752281075	DNA-directed RNA polymerase subunit A'
		TRIDC3BG072560	752462162	752463907	Conserved oligomeric Golgi complex subunit 4
		TRIDC3BG072640	752820649	752822288	Eukaryotic aspartyl protease family protein
		TRIDC3BG072650	752858875	752859100	1-aminocyclopropane-1-carboxylate oxidase homolog 3
		TRIDC3BG072670	752980590	752981754	methyl esterase 19
	chr4A	TRIDC4AG069310	714863239	714866540	unknown function
		TRIDC4AG069320	714919495	714922229	myb-like transcription factor family protein
		TRIDC4AG069330	714923903	714924207	undescribed protein
		TRIDC4AG069340	714924285	714925993	Grain length protein
		TRIDC4AG069350	714932402	714933818	F-box family protein
		TRIDC4AG069380	714970825	714973166	SKP1-like protein 4
		TRIDC4AG069390	714996033	714997763	Protein of unknown function (DUF819)
		TRIDC4AG069400	715034674	715036197	HXXXD-type acyl-transferase family protein
		TRIDC4AG069420	715067419	715067837	Protein CWC15 homolog
		TRIDC4AG069430	715073768	715073970	FAR1-related sequence 12
BobWhite_rep_c66361_594				715175771
		TRIDC4AG069480	715255816	715256342	Protein of unknown function (DUF594)
		TRIDC4AG069500	715272719	715275257	Leucine-rich repeat receptor-like protein kinase family protein
		TRIDC4AG069520	715292330	715293472	Pectin lyase-like superfamily protein
		TRIDC4AG069550	715297541	715299124	PPPDE putative thiol peptidase family protein
		TRIDC4AG069560	715305246	715306899	FBD-associated F-box protein
		TRIDC4AG069670	715578216	715579251	Eukaryotic aspartyl protease family protein
		TRIDC4AG069680	715610874	715611345	SKP1-like 4
	chr4B	TRIDC4BG002450	9683341	9683591	undescribed protein
		TRIDC4BG002460	9683552	9685213	Ankyrin repeat family protein
		TRIDC4BG002470	9716385	9716753	Outward rectifying potassium channel protein
		TRIDC4BG002480	9750294	9752364	FAR1-related sequence 5
		TRIDC4BG002490	9756630	9756923	undescribed protein
		TRIDC4BG002500	9779369	9781862	5-methyltetrahydropteroyltriglutamate--homocysteine methyltransferase 2
		TRIDC4BG002510	9783897	9784433	undescribed protein
		TRIDC4BG002520	9791793	9792015	undescribed protein
		TRIDC4BG002530	9792117	9792344	undescribed protein
		TRIDC4BG002540	9792636	9793134	22.0 kDa heat shock protein
		TRIDC4BG002550	9794200	9794867	DnaJ/Hsp40 cysteine-rich domain superfamily protein
		TRIDC4BG002560	9882325	9882933	unknown function
		TRIDC4BG002570	9955822	9956428	undescribed protein
		TRIDC4BG002580	9978165	9978870	undescribed protein
		TRIDC4BG002590	9976485	9979014	undescribed protein
		TRIDC4BG002600	10036559	10037136	undescribed protein
		TRIDC4BG002610	10051043	10051744	undescribed protein
		TRIDC4BG002620	10054357	10054954	undescribed protein
		TRIDC4BG002630	10460268	10461283	Replication protein A 32 kDa subunit A
		TRIDC4BG002640	10540514	10542250	cation calcium exchanger 4
		TRIDC4BG002650	10610581	10611327	non-specific phospholipase C5
		TRIDC4BG002660	10627961	10628529	non-specific phospholipase C4
		TRIDC4BG002670	10751325	10751720	undescribed protein
		TRIDC4BG002690	10752280	10753041	undescribed protein
		TRIDC4BG002680	10751866	10754615	Glucan endo-1,3-beta-glucosidase 8
		TRIDC4BG002700	10789064	10792315	N utilization substance protein B homolog
		TRIDC4BG002710	10806710	10807891	undescribed protein
		TRIDC4BG002720	10810787	10812266	TATA-box-binding protein 2
		TRIDC4BG002730	10815236	10815898	WRKY DNA-binding protein 57
		TRIDC4BG002740	10844799	10845380	ferredoxin 3
		TRIDC4BG002760	10845629	10848637	undescribed protein
		TRIDC4BG002750	10845486	10848765	Lactoylglutathione lyase / glyoxalase I family protein
		TRIDC4BG002770	10850851	10854016	DWNN domain, a CCHC-type zinc finger
		TRIDC4BG002780	10859699	10860058	Pre-rRNA-processing protein TSR2
		TRIDC4BG002790	10860569	10861111	undescribed protein
		TRIDC4BG002800	11017712	11019415	LOB domain-containing protein 4
		TRIDC4BG002810	11019993	11022295	unknown function
		TRIDC4BG002820	11025194	11026655	Membralin
		TRIDC4BG002830	11033510	11033827	undescribed protein
		TRIDC4BG002840	11041926	11042246	undescribed protein
		TRIDC4BG002850	11042216	11042565	SAUR-like auxin-responsive protein family
		TRIDC4BG002860	11149483	11152436	SAUR-like auxin-responsive protein family
		TRIDC4BG002870	11154092	11154395	SAUR-like auxin-responsive protein family
		TRIDC4BG002880	11220632	11221255	undescribed protein
		TRIDC4BG002890	11221180	11221862	response to karrikin
		TRIDC4BG002900	11222439	11222805	undescribed protein
		TRIDC4BG002910	11310845	11311342	tubulin beta chain 4
		TRIDC4BG002920	11334425	11335364	unknown function
		TRIDC4BG002930	11336047	11336932	30S ribosomal protein S8, chloroplastic
		TRIDC4BG002940	11337042	11337841	50S ribosomal protein L16, chloroplastic
		TRIDC4BG002950	11514637	11515623	unknown function
		TRIDC4BG002960	11521961	11522947	unknown function
		TRIDC4BG002970	11523413	11524230	Pathogenesis-related thaumatin superfamily protein
		TRIDC4BG002980	11523897	11529853	undescribed protein
		TRIDC4BG002990	11551324	11554380	Type IV inositol polyphosphate 5-phosphatase 7
		TRIDC4BG003000	11577265	11577575	undescribed protein
		TRIDC4BG003010	11587023	11587393	undescribed protein
CAP12_rep_c4571_181			7639988	11639988
		TRIDC4BG003110	12128423	12130045	Vicilin
		TRIDC4BG003130	12184069	12190759	U3 small nucleolar RNA-associated protein 25
		TRIDC4BG003150	12202400	12203066	unknown function
		TRIDC4BG003160	12331820	12383963	F-box/LRR-repeat protein 3
		TRIDC4BG003180	12388989	12391608	Expressed protein (With alternative splicing)
		TRIDC4BG003190	12389872	12392148	Expressed protein, having alternative splicing products
		TRIDC4BG003200	12414889	12416488	HcrVf2 protein-like
		TRIDC4BG003220	12420036	12420768	Acyl-CoA N-acyltransferases (NAT) superfamily protein
		TRIDC4BG003230	12422282	12423207	Protein of unknown function (DUF581)
		TRIDC4BG003250	12537200	12537468	Protein of unknown function (DUF1677)
		TRIDC4BG003260	12542329	12544453	ARM repeat superfamily protein
		TRIDC4BG045790	540321568	540327810	RNA cytidine acetyltransferase 1
		TRIDC4BG045820	540333212	540334311	Ribosome biogenesis protein TSR3 homolog
		TRIDC4BG045830	540336904	540339981	LL-diaminopimelate aminotransferase
		TRIDC4BG045850	540487154	540488948	undescribed protein
		TRIDC4BG045860	540516055	540517045	unknown function
		TRIDC4BG045870	540519218	540520128	serine carboxypeptidase-like 42
		TRIDC4BG045880	540520667	540523707	Carboxypeptidase Y homolog A
		TRIDC4BG045900	540557479	540558453	F-box domain containing protein, expressed
		TRIDC4BG045930	540691391	540693450	Ninja-family protein
		TRIDC4BG045940	540954538	540955820	Cytochrome b561 and DOMON domain-containing protein
		TRIDC4BG045960	540979966	540981607	Nascent polypeptide-associated complex subunit beta
		TRIDC4BG046000	541387511	541389258	F-box family protein
Kukri_rep_c79943_189				541798790
		TRIDC4BG046060	541873025	541873559	Mitochondrial import inner membrane translocase subunit TIM22-2
		TRIDC4BG046070	542019136	542021647	N-acetyltransferase 9-like protein
		TRIDC4BG046110	542257555	542258789	Calcium-dependent lipid-binding (CaLB domain) family protein
		TRIDC4BG046120	542259205	542261289	26S proteasome non-ATPase regulatory subunit 3 homolog A
		TRIDC4BG046130	542721081	542738146	polyamine oxidase 1
		TRIDC4BG046150	542827966	542832715	FRIGIDA-like protein
		TRIDC4BG046160	542837064	542838406	pumilio 5
		TRIDC4BG046170	543178651	543179249	60S ribosomal protein L18A-1
		TRIDC4BG046190	543201093	543202979	60 kDa chaperonin 5
		TRIDC4BG046220	544453928	544459962	GRAS family transcription factor
		TRIDC4BG046240	544982886	544986091	Ubiquitin carboxyl-terminal hydrolase 26
		TRIDC4BG046250	545501604	545503227	Inositol-3-phosphate synthase
		TRIDC4BG046280	545913759	545914451	Bifunctional inhibitor/lipid-transfer protein/seed storage 2S albumin superfamily protein
		TRIDC4BG046300	546350169	546353885	NADH dehydrogenase [ubiquinone] 1 alpha subcomplex subunit 13-B
	chr5A	TRIDC5AG047080	524583236	524583823	undescribed protein
		TRIDC5AG047090	524693926	524694604	Cytochrome P450 superfamily protein
		TRIDC5AG047100	524745779	524753322	Zinc finger CCCH domain-containing protein 19
		TRIDC5AG047110	524888463	524888967	UDP-Glycosyltransferase superfamily protein
		TRIDC5AG047120	524893074	524895124	Undecaprenyl-phosphate 4-deoxy-4-formamido-L-arabinose transferase
		TRIDC5AG047130	524897900	524899776	NEDD8-activating enzyme E1 regulatory subunit
		TRIDC5AG047140	525123257	525124024	unknown function
		TRIDC5AG047150	525184182	525184567	Subtilisin-like protease
		TRIDC5AG047160	525188055	525188665	Oxidoreductase, putative
		TRIDC5AG047170	525256738	525258931	Protein MEI2-like 6
		TRIDC5AG047180	526159218	526160016	undescribed protein
		TRIDC5AG047190	526162579	526163518	SHI-related sequence 5
		TRIDC5AG047200	526921471	526922941	Acidic endochitinase
		TRIDC5AG047210	526985414	526986173	receptor kinase 2
		TRIDC5AG047220	526992691	526993388	undescribed protein
		TRIDC5AG047230	527092742	527094594	undescribed protein
		TRIDC5AG047240	527139114	527140499	GDSL esterase/lipase
		TRIDC5AG047250	527316548	527317548	Ethylene-responsive transcription factor 1
		TRIDC5AG047260	527382874	527385461	Haloacid dehalogenase-like hydrolase (HAD) superfamily protein
		TRIDC5AG047270	527521011	527522815	Subtilisin-like protease
		TRIDC5AG047280	527787518	527788707	undescribed protein
		TRIDC5AG047290	528364651	528387922	Vacuolar protein sorting-associated protein 55 homolog
		TRIDC5AG047310	528391016	528391784	unknown function
		TRIDC5AG047300	528387752	528393448	undescribed protein
		TRIDC5AG047330	528718953	528720446	unknown function
		TRIDC5AG047320	528717907	528723671	undescribed protein
		TRIDC5AG047340	528891176	528893376	Hexosyltransferase
BobWhite_c19155_246				528942215
		TRIDC5AG047350	528941873	528942411	Protein STAY-GREEN, chloroplastic
		TRIDC5AG047370	528966603	528968189	UDP-Glycosyltransferase superfamily protein
		TRIDC5AG047380	529146709	529148781	60S ribosomal protein L44
		TRIDC5AG047400	529155429	529156241	Late embryogenesis abundant (LEA) hydroxyproline-rich glycoprotein family
		TRIDC5AG047410	529159626	529163024	Two-component response regulator-like PRR95
		TRIDC5AG047420	529220536	529221803	pentatricopeptide repeat 336
		TRIDC5AG047440	529382648	529387951	Alpha/beta hydrolase fold protein
		TRIDC5AG047450	529453125	529454530	myb domain protein 20
		TRIDC5AG047480	529905746	529908228	pantothenate kinase 2
		TRIDC5AG047490	529915695	529916076	Glucan endo-1,3-beta-glucosidase B
		TRIDC5AG047510	529924505	529926961	RNA-binding protein 42
		TRIDC5AG047530	529933231	529940763	Beta-fructofuranosidase, insoluble isoenzyme 1
		TRIDC5AG047550	530029093	530031655	purple acid phosphatase 29
	chr5B	TRIDC5BG052360	516941287	516942050	Leucine-rich repeat receptor-like protein kinase family protein
		TRIDC5BG052350	516944556	516946570	General transcription factor 2-related zinc finger protein
		TRIDC5BG052370	517073491	517075419	armadillo repeat only 1
		TRIDC5BG052380	517091014	517091524	unknown function
		TRIDC5BG052390	517091594	517092401	undescribed protein
		TRIDC5BG052400	517186869	517187912	Pathogenesis-related thaumatin superfamily protein
		TRIDC5BG052430	517549352	517550392	Major facilitator superfamily protein
		TRIDC5BG052440	517863402	517864106	ATP-dependent 6-phosphofructokinase 2
		TRIDC5BG052460	518163552	518165069	Cytochrome P450 superfamily protein
		TRIDC5BG052470	518316683	518320293	Peptidyl-prolyl cis-trans isomerase B
		TRIDC5BG052480	518327801	518328153	Defensin-like protein 1
		TRIDC5BG052500	518380059	518382286	purple acid phosphatase 15
		TRIDC5BG052520	518596196	518599964	Proteasome subunit alpha type-7-B
IAAV5683				518614625
		TRIDC5BG052530	518605846	518614652	Topoisomerase II-associated protein PAT1
		TRIDC5BG052550	518652002	518653044	L-gulonolactone oxidase 2
		TRIDC5BG052590	518756700	518758258	Glucan endo-1,3-beta-glucosidase
		TRIDC5BG052620	519328718	519329635	myb domain protein 4
		TRIDC5BG062240	586592177	586594530	Prolyl 4-hydroxylase subunit alpha-1
		TRIDC5BG062260	586595229	586596011	undescribed protein
		TRIDC5BG062250	586595214	586596288	Protein kinase superfamily protein
		TRIDC5BG062270	586608755	586609412	undescribed protein
		TRIDC5BG062280	586639470	586642030	Protein of unknown function, DUF593
		TRIDC5BG062290	586646885	586647412	undescribed protein
		TRIDC5BG062300	586647573	586648518	Plant protein of unknown function (DUF863)
		TRIDC5BG062310	586774268	586774521	Alpha-N-acetylglucosaminidase
		TRIDC5BG062320	586789094	586790316	Peroxidase superfamily protein
		TRIDC5BG062330	586794636	586795073	Peroxidase superfamily protein
		TRIDC5BG062340	586795130	586795375	Peroxidase superfamily protein
		TRIDC5BG062350	586864811	586865228	unknown function
		TRIDC5BG062360	586865356	586865852	undescribed protein
		TRIDC5BG062370	587048960	587051431	Family of unknown function (DUF566)
		TRIDC5BG062380	587057457	587060167	Aminotransferase-like, plant mobile domain family protein
		TRIDC5BG062390	587061387	587063581	Protein kinase superfamily protein
		TRIDC5BG062400	587065466	587065844	undescribed protein
		TRIDC5BG062410	587066324	587067695	undescribed protein
		TRIDC5BG062420	587188282	587188980	undescribed protein
		TRIDC5BG062430	587189048	587189589	Histone superfamily protein
		TRIDC5BG062440	587413618	587414794	Acyl-CoA N-acyltransferases (NAT) superfamily protein
		TRIDC5BG062450	587415863	587416357	undescribed protein
		TRIDC5BG062460	587735299	587736232	Zinc finger protein 1
		TRIDC5BG062470	588085193	588093215	Protein kinase superfamily protein
		TRIDC5BG062480	588199842	588201959	undescribed protein
		TRIDC5BG062490	588202120	588204985	undescribed protein
		TRIDC5BG062500	588327210	588327564	SWIB complex BAF60b domain-containing protein
		TRIDC5BG062510	588329680	588330125	undescribed protein
		TRIDC5BG062520	588362988	588364078	Two-component response regulator ARR2
		TRIDC5BG062530	588458169	588458417	undescribed protein
		TRIDC5BG062540	588522769	588526730	Protein kinase superfamily protein
		TRIDC5BG062550	588529788	588531843	unknown function
		TRIDC5BG062560	588727949	588728245	undescribed protein
		TRIDC5BG062570	588728079	588729035	DOF zinc finger protein 1
		TRIDC5BG062580	588841201	588844247	protein kinase family protein
		TRIDC5BG062600	588847023	588847467	undescribed protein
		TRIDC5BG062590	588846189	588848561	unknown function
		TRIDC5BG062620	588849698	588850431	undescribed protein
		TRIDC5BG062610	588849736	588851889	Signal peptidase I
		TRIDC5BG062630	588852958	588856121	Nuclear pore complex protein NUP58
		TRIDC5BG062640	588918185	588919450	unknown function
		TRIDC5BG062650	588923650	588925832	unknown function
		TRIDC5BG062660	588926041	588926754	maternal effect embryo arrest 14
		TRIDC5BG062670	589217296	589220330	Molybdenum cofactor sulfurase
		TRIDC5BG062680	589234442	589235346	Cytochrome b6-f complex subunit 7
		TRIDC5BG062690	589235677	589236756	Transmembrane protein 147
		TRIDC5BG062700	589270996	589271810	undescribed protein
		TRIDC5BG062710	589271444	589271870	undescribed protein
		TRIDC5BG062720	589337741	589342238	Myb-like DNA-binding domain, SHAQKYF class family protein, expressed
		TRIDC5BG062730	589349830	589350484	unknown function
		TRIDC5BG062740	589519809	589520690	undescribed protein
		TRIDC5BG062750	589521935	589522918	unknown function
		TRIDC5BG062760	589558721	589562312	Proteasome assembly chaperone 2
		TRIDC5BG062770	589611485	589612154	allene oxide synthase
		TRIDC5BG062780	589695675	589696913	Thioredoxin superfamily protein
		TRIDC5BG062790	589896191	589897052	Phototropic-responsive NPH3 family protein
		TRIDC5BG062800	589899271	589900194	Pentatricopeptide repeat-containing protein
		TRIDC5BG062820	590032590	590032968	undescribed protein
		TRIDC5BG062810	590032190	590033642	cold-regulated 413-plasma membrane 2
		TRIDC5BG062830	590059022	590059908	MATE efflux family protein
		TRIDC5BG062840	590064247	590064634	undescribed protein
		TRIDC5BG062850	590066306	590067545	Aspartic proteinase nepenthesin-1
		TRIDC5BG062860	590072000	590072916	undescribed protein
		TRIDC5BG062880	590073592	590073833	undescribed protein
		TRIDC5BG062870	590073891	590074781	CASP-like protein 5C1
		TRIDC5BG062890	590095210	590095749	N-terminal protein myristoylation
		TRIDC5BG062900	590111503	590111984	undescribed protein
		TRIDC5BG062910	590295557	590296087	N-terminal protein myristoylation
		TRIDC5BG062930	590570639	590572633	undescribed protein
		TRIDC5BG062920	590570581	590572696	undescribed protein
		TRIDC5BG062940	590576657	590579229	Protein of unknown function, DUF547
		TRIDC5BG062950	590786251	590788395	Protein of unknown function (DUF616)
		TRIDC5BG062960	590790571	590792316	30S ribosomal protein S9
		TRIDC5BG062970	590792352	590792579	undescribed protein
Excalibur_c3165_730				590819414
		TRIDC5BG062980	590819036	590821459	BTB/POZ domain-containing protein
		TRIDC5BG062990	590834762	590835322	calmodulin-like 41
		TRIDC5BG063000	590843523	590845763	Cytochrome c biogenesis protein CcsB
		TRIDC5BG063010	590858302	590858537	unknown function
		TRIDC5BG063020	590959891	590961021	Protein PHLOEM PROTEIN 2-LIKE A10
		TRIDC5BG063030	590964148	590965362	E3 ubiquitin-protein ligase MARCH6
		TRIDC5BG063040	590983160	590983754	Ocs element-binding factor 1
		TRIDC5BG063050	591004207	591007475	RNA-binding protein 1
		TRIDC5BG063070	591440804	591443280	AP2-like ethylene-responsive transcription factor
		TRIDC5BG063090	591459617	591460750	Chitinase family protein
		TRIDC5BG064140	598611364	598613837	Retrotransposon protein, putative, Ty3-gypsy subclass
		TRIDC5BG064150	598685083	598685888	RING/U-box superfamily protein
		TRIDC5BG064160	598851108	598851361	Transposon protein, putative, Mutator sub-class
		TRIDC5BG064170	599213844	599218124	beta glucosidase 40
		TRIDC5BG064180	599511284	599512080	PIF1 helicase
		TRIDC5BG064190	599741624	599743294	Elongation factor 1-alpha
		TRIDC5BG064210	600506564	600510835	undescribed protein
		TRIDC5BG064220	600795398	600796042	unknown function
IACX5390				600810891
		TRIDC5BG064250	600809242	600811012	actin depolymerizing factor 6
		TRIDC5BG064270	600830475	600830726	Inosine-5'-monophosphate dehydrogenase
		TRIDC5BG064280	600836747	600838546	tubulin beta chain 2
		TRIDC5BG064290	600869885	600871096	fatty acid hydroxylase 1
		TRIDC5BG064300	600872054	600873201	Alpha N-terminal protein methyltransferase 1
		TRIDC5BG064310	600876016	600877827	Ribosome-binding ATPase YchF
		TRIDC5BG064320	600879555	600882142	Pentatricopeptide repeat-containing protein
		TRIDC5BG064330	600884117	600884587	Ribose-5-phosphate isomerase A
		TRIDC5BG064340	600885421	600887229	ribose-5-phosphate isomerase 2
		TRIDC5BG064360	600969707	600971141	GDSL esterase/lipase
	chr6A	TRIDC6AG002190	8273786	8281017	Mitochondrial transcription termination factor family protein
		TRIDC6AG002210	8290053	8290920	receptor-like protein kinase 4
		TRIDC6AG002220	8320581	8321796	Protein kinase superfamily protein
		TRIDC6AG002230	8327467	8331801	aspartate aminotransferase 1
		TRIDC6AG002240	8332520	8345009	Ripening related protein family
		TRIDC6AG002250	8352942	8353685	Ripening-related protein 3
		TRIDC6AG002310	8433740	8434482	unknown function
		TRIDC6AG002320	8519185	8520058	RNA-binding protein 48
		TRIDC6AG002330	8523118	8528758	COPII coat assembly protein SEC16
BobWhite_c22086_444				8529327
		TRIDC6AG002360	8546600	8549696	3-oxoacyl-[acyl-carrier-protein] reductase 4
		TRIDC6AG002390	8575078	8580298	Protein kinase family protein
		TRIDC6AG008150	34670303	34673511	Mitochondrial transcription termination factor family protein
		TRIDC6AG008160	34679039	34689716	MATE efflux family protein
		HMW/LMW-16*		34690496	Tdurum_contig42729_433
		TRIDC6AG008170	34689852	34690760	Poly(A) RNA polymerase protein 2
		TRIDC6AG008180	34698281	34698634	Histone deacetylase complex subunit SAP18
		TRIDC6AG008190	34702066	34704179	Pentatricopeptide repeat-containing protein
		TRIDC6AG008200	34930767	34933208	Glyoxylate/hydroxypyruvate reductase A
		TRIDC6AG008210	35090587	35093889	terpene synthase 14
		TRIDC6AG037160	453245490	453250777	Abhydrolase domain-containing protein
		TRIDC6AG037170	453549459	453553236	ATP-dependent zinc metalloprotease FtsH
		TRIDC6AG037180	453553660	453554482	undescribed protein
		TRIDC6AG037190	453556560	453557355	Cytochrome b5
		TRIDC6AG037210	453672087	453674176	YELLOW STRIPE like 2
		TRIDC6AG037220	453832218	453833227	YELLOW STRIPE like 3
		TRIDC6AG037230	453852990	453854124	Protein kinase superfamily protein
		TRIDC6AG037250	454158969	454160832	DNA repair and recombination protein RAD54-like
		TRIDC6AG037260	454161051	454162823	DNA/RNA helicase protein
		TRIDC6AG037300	454314893	454316921	U6 snRNA phosphodiesterase
		TRIDC6AG037310	454484328	454485499	chaperone protein dnaJ-related
		TRIDC6AG037320	454650881	454651722	unknown function
		TRIDC6AG037350	455132617	455133343	cyclin p4;3
		TRIDC6AG037360	455389774	455392281	WRKY DNA-binding protein 13
		TRIDC6AG037370	455433641	455434220	ELMO domain-containing protein A
		TRIDC6AG037390	455479716	455481726	Vesicle-associated membrane protein-associated protein A
		TRIDC6AG037400	455484284	455486784	50S ribosomal protein L19
		TRIDC6AG037410	455672308	455674675	Sugar phosphate exchanger 2
		TRIDC6AG037460	455915301	455915774	early nodulin-like protein 5
		TRIDC6AG037470	455952934	455953387	HXXXD-type acyl-transferase family protein
		TRIDC6AG037490	456110724	456112331	Phospholipase A1-II 4
		TRIDC6AG037500	456227666	456228836	Fatty acid oxidation complex subunit alpha
Tdurum_contig78006_158				456240525
		TRIDC6AG037530	456264270	456266162	Transcription initiation factor TFIID subunit 4b
		TRIDC6AG037540	456322455	456326496	Ubiquitin carboxyl-terminal hydrolase
		TRIDC6AG037550	456326979	456328788	Protein of unknown function (DUF630 and DUF632)
		TRIDC6AG037560	456348964	456352198	ABC transporter G family member 42
		TRIDC6AG037570	456353723	456354605	Ethylene-responsive transcription factor 1
		TRIDC6AG037580	456354522	456355398	Retrotransposon protein, putative, unclassified
		TRIDC6AG037620	456563194	456563611	Ethylene-responsive transcription factor 5
		TRIDC6AG037630	456568374	456574177	3-isopropylmalate dehydratase small subunit 3
		TRIDC6AG037640	456673583	456674979	PPPDE putative thiol peptidase family protein
		TRIDC6AG037650	456676999	456678807	alpha/beta-Hydrolases superfamily protein
		TRIDC6AG037660	456921461	456921798	beta-xylosidase 3
		TRIDC6AG037670	457064182	457065903	Ceramide kinase
		TRIDC6AG037700	457246605	457248611	receptor-like kinase 1
		TRIDC6AG037720	457299377	457300285	amino acid transporter 1
		TRIDC6AG037730	457411899	457412354	RING/U-box superfamily protein
		TRIDC6AG037760	457527367	457529821	Transmembrane protein 208
		TRIDC6AG037790	457530589	457532318	Uracil permease
		TRIDC6AG037800	457574983	457575342	Late embryogenesis abundant (LEA) hydroxyproline-rich glycoprotein family
		TRIDC6AG037820	457601521	457603189	Cytochrome P450 superfamily protein
		TRIDC6AG037850	458271755	458272180	Low temperature and salt responsive protein family
		TRIDC6AG037860	458352192	458353668	Aquaporin-like superfamily protein
		TRIDC6AG037870	458359412	458360312	ABC transporter B family member 20
		TRIDC6AG037880	458360668	458361364	Molybdopterin synthase sulfur carrier subunit
		TRIDC6AG037890	458361437	458363271	APO protein 3, mitochondrial
		TRIDC6AG037910	458377904	458379036	protein kinase family protein
		TRIDC6AG037920	458629034	458631408	Subtilisin-like protease
	chr6B	TRIDC6BG011610	62616706	62630437	Mitochondrial transcription termination factor family protein
		TRIDC6BG011680	63051497	63052157	Acetolactate synthase
		TRIDC6BG011690	63091659	63099227	unknown function
		TRIDC6BG011700	63157219	63158206	F-box domain containing protein
		TRIDC6BG011710	63252732	63253163	unknown function
		TRIDC6BG011720	63302555	63303760	Orphans transcription factor
		TRIDC6BG011730	63516535	63517003	unknown function
		TRIDC6BG011740	63625613	63626566	unknown function
		TRIDC6BG011760	63891034	63891727	undescribed protein
		TRIDC6BG011750	63891033	63891982	undescribed protein
		TRIDC6BG011770	63892353	63893445	undescribed protein
		TRIDC6BG011780	63894897	63896448	unknown function
		TRIDC6BG011790	63912524	63914288	F-box/RNI-like superfamily protein
		TRIDC6BG011800	64086070	64086607	undescribed protein
		TRIDC6BG011810	64098802	64100154	unknown function
		TRIDC6BG011820	64102473	64104279	arginine/serine-rich splicing factor 35
		TRIDC6BG011830	64224049	64225380	Cathepsin B-like cysteine proteinase 5
		TRIDC6BG011840	64230254	64230974	NAC domain-containing protein 7
		TRIDC6BG011850	64235211	64235915	Histone-lysine N-methyltransferase ATXR6
		TRIDC6BG011860	64354866	64355460	undescribed protein
		TRIDC6BG011870	64355345	64355867	Calcium-binding EF-hand family protein
		TRIDC6BG011880	64355786	64356476	undescribed protein
		TRIDC6BG011890	64452363	64453432	undescribed protein
		TRIDC6BG011900	64454551	64455252	unknown function
		TRIDC6BG011910	64518715	64520674	undescribed protein
		TRIDC6BG011920	64520195	64520947	undescribed protein
		TRIDC6BG011930	64592664	64594384	receptor-like protein kinase 2
		TRIDC6BG011940	64647763	64647983	undescribed protein
		TRIDC6BG011950	64768968	64772300	geranyl diphosphate synthase 1
		TRIDC6BG011960	64774356	64775329	unknown function
		TRIDC6BG011970	64842420	64846332	ARC6
IAAV7349				64846436
		TRIDC6BG011980	64873654	64875261	Eukaryotic translation initiation factor 3 subunit J-A
		TRIDC6BG011990	64988027	64991368	undescribed protein
		TRIDC6BG012000	64988020	64991397	undescribed protein
		TRIDC6BG012010	64991572	64992523	receptor-like protein kinase 2
		TRIDC6BG012020	64994700	64997172	Leucine-rich repeat receptor-like protein kinase family protein
		TRIDC6BG012030	65093028	65093884	F-box and associated interaction domains-containing protein
		TRIDC6BG012040	65118092	65119059	undescribed protein
		TRIDC6BG012050	65119848	65121355	Mitochondrial transcription termination factor family protein
		TRIDC6BG012060	65350970	65351836	undescribed protein
		TRIDC6BG012070	65351490	65352663	undescribed protein
		TRIDC6BG012080	65352910	65355120	undescribed protein
		TRIDC6BG012090	65609756	65610710	undescribed protein
		TRIDC6BG012100	65615113	65619331	undescribed protein
		TRIDC6BG012110	65616355	65621633	undescribed protein
		TRIDC6BG012120	65622793	65626958	MATE efflux family protein
		TRIDC6BG016820	116005048	116006859	glyceraldehyde-3-phosphate dehydrogenase C2
		TRIDC6BG016830	116291120	116346729	Xanthine dehydrogenase/oxidase
		TRIDC6BG016840	116435322	116437687	Glycosyltransferase family 61 protein
		TRIDC6BG016850	116442226	116442800	Glycosyltransferase family 61 protein
		TRIDC6BG016860	116442923	116443404	Glycosyltransferase family 61 protein
		TRIDC6BG016870	116443509	116445882	unknown function
		TRIDC6BG016880	116573617	116576759	undescribed protein
		TRIDC6BG016890	116586376	116588000	Cytochrome P450 superfamily protein
		TRIDC6BG016900	116670920	116679221	Pentatricopeptide repeat-containing protein
		TRIDC6BG016910	116792462	116794842	Pentatricopeptide repeat-containing protein
		TRIDC6BG016920	116815611	116818272	Pentatricopeptide repeat-containing protein
		TRIDC6BG016930	116857567	116862598	Pentatricopeptide repeat-containing protein
		TRIDC6BG016940	117078948	117079641	unknown function
		TRIDC6BG016950	117108457	117110161	unknown function
		TRIDC6BG016960	117143727	117145320	undescribed protein
		TRIDC6BG016970	117173946	117174422	undescribed protein
		TRIDC6BG016990	117174823	117175465	undescribed protein
		TRIDC6BG016980	117174373	117178088	unknown function
		TRIDC6BG017000	117303369	117304028	unknown function
		TRIDC6BG017010	117351004	117355970	UBX domain-containing protein 1-A
		TRIDC6BG017020	117477052	117478366	Calmodulin-binding protein
		TRIDC6BG017030	117862826	117864597	unknown function
		TRIDC6BG017040	117866512	117867156	undescribed protein
		TRIDC6BG017050	118371435	118371825	undescribed protein
		TRIDC6BG017070	118485622	118486366	Cytochrome P450 superfamily protein
		TRIDC6BG017080	118486471	118487523	Cytochrome P450 superfamily protein
		TRIDC6BG017090	118490241	118490959	undescribed protein
		TRIDC6BG017060	118502647	118504875	PWWP domain protein
		TRIDC6BG017100	118718147	118720529	copper ion binding;cobalt ion binding;zinc ion binding
		TRIDC6BG017110	118830021	118831922	undescribed protein
		TRIDC6BG017120	118851680	118852657	undescribed protein
		TRIDC6BG017130	118858419	118859280	undescribed protein
		TRIDC6BG017150	118894817	118896204	undescribed protein
		TRIDC6BG017140	118894379	118898626	pfkB-like carbohydrate kinase family protein
		TRIDC6BG017160	118930107	118930893	undescribed protein
		TRIDC6BG017170	119217349	119217942	undescribed protein
		TRIDC6BG017180	119244439	119246967	anthranilate phosphoribosyltransferase, putative
		TRIDC6BG017190	119377644	119379467	Endoglucanase 11
		TRIDC6BG017200	119380622	119381012	unknown function
		TRIDC6BG017210	119519320	119520811	undescribed protein
		TRIDC6BG017220	119519372	119523005	undescribed protein
		TRIDC6BG017230	119760362	119761960	Eukaryotic aspartyl protease family protein
		TRIDC6BG017240	119855816	119856435	undescribed protein
		TRIDC6BG017250	119859557	119860989	Chlorophyll a-b binding protein, chloroplastic
		TRIDC6BG017260	120048003	120050710	Endoglucanase 11
RAC875_c17559_3102				120052990
		TRIDC6BG017270	120090609	120091705	actin 7
		TRIDC6BG017280	120164285	120164787	undescribed protein
		TRIDC6BG017290	120165872	120166836	undescribed protein
		TRIDC6BG017300	120178034	120178565	undescribed protein
		TRIDC6BG017310	120178704	120179280	undescribed protein
		TRIDC6BG017320	120226912	120227987	Chlorophyll a-b binding protein 3C, chloroplastic
		TRIDC6BG017330	120272304	120272432	Chlorophyll a-b binding protein 3B, chloroplastic (Fragments)
		TRIDC6BG017340	120292477	120293594	Chlorophyll a-b binding protein, chloroplastic
		TRIDC6BG017350	120301049	120301247	Chlorophyll a-b binding protein, chloroplastic
		TRIDC6BG017360	120301399	120301750	Chlorophyll a-b binding protein 3B, chloroplastic (Fragments)
		TRIDC6BG017370	120321887	120323115	undescribed protein
		TRIDC6BG017380	120329714	120330742	Chlorophyll a-b binding protein, chloroplastic
		TRIDC6BG017390	120369985	120371223	Chlorophyll a-b binding protein, chloroplastic
		TRIDC6BG017400	120373385	120374103	Chlorophyll a-b binding protein, chloroplastic
		TRIDC6BG017410	120377450	120377767	undescribed protein
		TRIDC6BG017420	120377986	120378493	undescribed protein
		TRIDC6BG017430	120382841	120387185	Isoleucine--trna ligase
		TRIDC6BG017440	120450642	120451448	Two-component response regulator ARR12
		TRIDC6BG017450	120453652	120455632	undescribed protein
		TRIDC6BG017460	120591397	120592664	undescribed protein
		TRIDC6BG017470	120595359	120596278	undescribed protein
		TRIDC6BG017480	120598005	120601022	undescribed protein
		TRIDC6BG017490	120735286	120736164	unknown function
		TRIDC6BG017500	120736233	120738417	undescribed protein
		TRIDC6BG017510	120743650	120745171	Uncharacterised conserved protein (UCP030365)
		TRIDC6BG017520	120817765	120818360	RING/U-box superfamily protein
		TRIDC6BG017530	121470534	121471599	undescribed protein
		TRIDC6BG017540	121704119	121704611	undescribed protein
		TRIDC6BG017550	121725439	121727497	P-loop containing nucleoside triphosphate hydrolases superfamily protein
		TRIDC6BG017560	121882268	121884759	RNA-binding protein 41
		TRIDC6BG017570	121886233	121888229	BRCT domain-containing protein
		TRIDC6BG017580	122264087	122269524	BRCT domain-containing protein
		TRIDC6BG017590	122546608	122549978	E3 ubiquitin-protein ligase MARCH8
		TRIDC6BG017600	122551217	122554485	NAD(P)H-quinone oxidoreductase subunit H
		TRIDC6BG017610	122555512	122556505	undescribed protein
		TRIDC6BG062620	650299919	650301877	Pentatricopeptide repeat-containing protein
		TRIDC6BG062630	650307354	650315323	Disease resistance protein
		TRIDC6BG062650	650340666	650341808	undescribed protein
		TRIDC6BG062640	650340889	650342657	CCR4-NOT transcription complex subunit 7
		TRIDC6BG062660	650374163	650374755	T-complex protein 1 subunit delta
		TRIDC6BG062670	650398679	650400661	undescribed protein
		TRIDC6BG062680	650398679	650401689	undescribed protein
		TRIDC6BG062690	650462197	650463683	unknown function
		TRIDC6BG062700	651014879	651015831	undescribed protein
		TRIDC6BG062710	651394952	651399752	Two-component response regulator ORR23
		TRIDC6BG062720	651400942	651401430	hAT dimerisation domain-containing protein / transposase-related
		TRIDC6BG062730	651594865	651597316	Protein of Unknown Function (DUF239)
		TRIDC6BG062740	652034667	652035916	MADS-box transcription factor family protein
		TRIDC6BG062750	652156531	652159570	Transmembrane protein 184C
		TRIDC6BG062760	652166257	652169250	Alpha/beta hydrolase domain-containing protein 13
		TRIDC6BG062770	652170214	652170556	undescribed protein
		TRIDC6BG062780	652170737	652172226	Tumor necrosis factor receptor superfamily member 21
		TRIDC6BG062790	652172387	652175046	undescribed protein
		TRIDC6BG062800	652221554	652229583	Protein kinase superfamily protein
Excalibur_c92249_102				652231937
		TRIDC6BG062810	652231329	652231975	unknown function
		TRIDC6BG062820	652297836	652298189	Ethylene-responsive transcription factor 4
		TRIDC6BG062830	652513950	652514060	60S ribosomal protein L39-1
		TRIDC6BG062840	652516795	652519236	Plasma membrane ATPase 4
		TRIDC6BG062850	652695433	652699923	DNA helicase MCM8
		TRIDC6BG062860	652704521	652707310	aspartate aminotransferase 5
		TRIDC6BG062870	652767734	652769975	SAC3/GANP domain protein
		TRIDC6BG062880	652770448	652771700	undescribed protein
		TRIDC6BG062890	652774607	652775861	undescribed protein
		TRIDC6BG062900	652776041	652776817	unknown function
		TRIDC6BG062910	653036959	653037343	undescribed protein
		TRIDC6BG062920	653037098	653037850	Alginate regulatory protein AlgP
		TRIDC6BG062930	653049731	653052016	Transmembrane 9 superfamily member 11
		TRIDC6BG062940	653194662	653196006	Alpha-1,6-mannosyl-glycoprotein 2-beta-N-acetylglucosaminyltransferase
		TRIDC6BG062950	653200074	653203316	receptor kinase 3
		TRIDC6BG062960	653208563	653209213	undescribed protein
		TRIDC6BG062970	653209225	653209483	undescribed protein
		TRIDC6BG062980	653265071	653266231	Nucleic acid binding protein
		TRIDC6BG062990	653294314	653297108	undescribed protein
		TRIDC6BG063000	653305333	653305614	Ankyrin repeat and KH domain-containing protein mask
		TRIDC6BG063010	653305932	653306403	undescribed protein
		TRIDC6BG063020	653354992	653356245	Vacuolar-processing enzyme
		TRIDC6BG063030	653546665	653547168	unknown function
		TRIDC6BG063040	653913729	653916168	undescribed protein
		TRIDC6BG063050	653933202	653933961	Vacuolar-processing enzyme
		TRIDC6BG063060	653958632	653959475	unknown function
		TRIDC6BG063070	653959802	653960587	undescribed protein
		TRIDC6BG063080	653970029	653970975	undescribed protein
	chr7B	TRIDC7BG014440	115870448	115873486	Hexosyltransferase
		TRIDC7BG014450	115904168	115905958	laccase 17
		TRIDC7BG014460	115955942	115956971	unknown function
		TRIDC7BG014470	115958947	115962815	Protein transport protein Sec61 subunit alpha
		TRIDC7BG014480	115987796	115990811	Transcription initiation factor TFIID subunit 10
		TRIDC7BG014490	116183222	116188572	undescribed protein
		TRIDC7BG014500	116246893	116248205	TRICHOME BIREFRINGENCE-LIKE 27
		TRIDC7BG014510	116294807	116295434	TRICHOME BIREFRINGENCE-LIKE 27
		TRIDC7BG014520	116296625	116297067	undescribed protein
		TRIDC7BG014530	116297729	116298598	undescribed protein
		TRIDC7BG014540	116583593	116587128	unknown function
		TRIDC7BG014550	116627845	116629341	undescribed protein
		TRIDC7BG014560	116629236	116629959	undescribed protein
		TRIDC7BG014570	116647289	116648442	undescribed protein
		TRIDC7BG014580	116871966	116872340	undescribed protein
		TRIDC7BG014590	117068436	117070819	Pre-mRNA-splicing factor SYF1
		TRIDC7BG014600	117086472	117086963	N-terminal protein myristoylation
		TRIDC7BG014610	117122774	117123462	tRNA (guanine-N-7) methyltransferase
		TRIDC7BG014620	117123706	117125727	Ankyrin repeat family protein
		TRIDC7BG014630	117163435	117169809	F-box/RNI-like superfamily protein
		TRIDC7BG014640	117234223	117234462	Peroxidase
		TRIDC7BG014650	117234789	117235523	Peroxidase superfamily protein
		TRIDC7BG014660	117245460	117246661	Peroxidase superfamily protein
		TRIDC7BG014670	117279838	117280560	undescribed protein
		TRIDC7BG014680	117331629	117332130	SKP1-like 4
		TRIDC7BG014690	117582837	117583105	undescribed protein
		TRIDC7BG014700	117583140	117589930	DNA polymerase lambda
		TRIDC7BG014710	117595175	117596711	thiol-disulfide oxidoreductase DCC
		TRIDC7BG014720	117629158	117631079	Signal recognition particle receptor subunit beta
		TRIDC7BG014730	117683193	117684310	Peroxidase superfamily protein
		TRIDC7BG014740	117684531	117686336	Protein of unknown function (DUF630 and DUF632)
		TRIDC7BG014750	117687381	117688964	undescribed protein
		TRIDC7BG014760	117690991	117691364	undescribed protein
		TRIDC7BG014770	117701492	117702536	undescribed protein
		TRIDC7BG014780	117725614	117726580	undescribed protein
		TRIDC7BG014790	117726616	117727627	undescribed protein
		TRIDC7BG014800	117812462	117814976	Peroxidase superfamily protein
		TRIDC7BG014810	117858393	117859451	xyloglucan endotransglucosylase/hydrolase 2
		TRIDC7BG014820	118018029	118019127	Peroxidase superfamily protein
		TRIDC7BG014830	118072925	118073544	Peroxidase
		TRIDC7BG014840	118153270	118154385	Peroxidase superfamily protein
		TRIDC7BG014850	118173120	118174023	Peroxidase superfamily protein
		TRIDC7BG014860	118365919	118366317	undescribed protein
		TRIDC7BG014870	118383127	118383881	undescribed protein
		TRIDC7BG014880	118384066	118385122	undescribed protein
		TRIDC7BG014890	118400933	118401608	xyloglucan endotransglucosylase/hydrolase 1
		TRIDC7BG014900	118403435	118406300	NACHT, LRR and PYD domains-containing protein 5
		TRIDC7BG014910	118567931	118568383	BED zinc finger ;hAT family dimerisation domain
		TRIDC7BG014920	118601857	118603892	amino acid permease 1
		TRIDC7BG014930	118610467	118611618	undescribed protein
		TRIDC7BG014940	118694229	118699466	Chaperone protein dnaJ 16
		TRIDC7BG014950	119123076	119124917	NAC domain protein,
		TRIDC7BG014960	119410352	119413873	Base excision DNA repair protein
		TRIDC7BG014970	119478327	119479889	U-box domain-containing protein 40
		TRIDC7BG014980	119480808	119483463	Protein CREG1
		TRIDC7BG014990	119527253	119527967	WD repeat-containing protein 86
wsnp_Ku_c11060_1814768				119625169
		TRIDC7BG015000	119624938	119635466	RNA-binding protein 47
		TRIDC7BG015010	119636278	119636651	undescribed protein
		TRIDC7BG015020	119654941	119656698	Phosphoacetylglucosamine mutase
		TRIDC7BG015030	119657581	119662147	unknown function
		TRIDC7BG015040	119760618	119763092	NAD(P)-linked oxidoreductase superfamily protein
		TRIDC7BG015050	119768433	119769050	Family of unknown function (DUF716)
		TRIDC7BG015060	119800371	119800971	matrix metalloproteinase
		TRIDC7BG015070	120205520	120206299	unknown function
		TRIDC7BG015080	120295271	120296114	Protein NRT1/ PTR FAMILY 5.8
		TRIDC7BG015090	120688983	120691447	O-fucosyltransferase family protein
		TRIDC7BG047970	541615430	541617352	MORC family CW-type zinc finger protein 3
		TRIDC7BG047990	541619670	541621173	expansin A2
		TRIDC7BG048000	541622034	541622332	undescribed protein
		TRIDC7BG048010	541960025	541965021	Disease resistance protein (CC-NBS-LRR class) family
		TRIDC7BG048020	541965419	541966237	undescribed protein
		TRIDC7BG048030	541990705	541990962	undescribed protein
		TRIDC7BG048040	542128673	542132920	unknown function
		TRIDC7BG048050	542175920	542177071	U-box domain-containing protein
		TRIDC7BG048060	542248835	542249693	unknown function
		TRIDC7BG048070	542306364	542307982	FAD-binding Berberine family protein
		TRIDC7BG048080	542330610	542333494	undescribed protein
		TRIDC7BG048090	542330596	542335063	undescribed protein
		TRIDC7BG048100	542356656	542357801	undescribed protein
		TRIDC7BG048110	542360359	542360863	undescribed protein
		TRIDC7BG048120	542467338	542468237	Integral membrane HRF1 family protein
		TRIDC7BG048130	542469550	542470323	Protein kinase superfamily protein
		TRIDC7BG048140	542640481	542641486	F-box domain containing protein
		TRIDC7BG048150	542832219	542834309	Uncharacterised conserved protein UCP015417, vWA
		TRIDC7BG048160	542866477	542868821	Serine/threonine-protein kinase
		TRIDC7BG048170	542911571	542912324	Serine/threonine-protein kinase
		TRIDC7BG048180	542931049	542933001	Pentatricopeptide repeat-containing protein
		TRIDC7BG048190	542933195	542936315	Methionine--tRNA ligase
Kukri_c39759_102				542938246
		TRIDC7BG048210	543019138	543021659	Serine/threonine-protein kinase
		TRIDC7BG048200	543017304	543025048	unknown function
		TRIDC7BG048220	543171196	543172207	undescribed protein
		TRIDC7BG048230	543304564	543306760	Carboxypeptidase Y homolog A
		TRIDC7BG048240	543339649	543340236	undescribed protein
		TRIDC7BG048250	543340520	543344230	undescribed protein
		TRIDC7BG048260	543349793	543351366	unknown function
		TRIDC7BG048270	543390263	543391909	undescribed protein
		TRIDC7BG048280	543391974	543392255	undescribed protein
		TRIDC7BG048290	543392328	543392883	undescribed protein
		TRIDC7BG048300	543393432	543394285	undescribed protein
		TRIDC7BG048310	543394238	543394598	undescribed protein
		TRIDC7BG048320	544157235	544157628	Ubiquitin-fold modifier 1
		TRIDC7BG048330	544392203	544394537	F-box family protein
		TRIDC7BG048340	544406740	544407530	unknown function
		TRIDC7BG048350	544411644	544417098	RAB6A-GEF complex partner protein 2
		TRIDC7BG048370	544737535	544738628	unknown function
		TRIDC7BG048360	544734371	544754553	undescribed protein
		TRIDC7BG048380	544754475	544754811	unknown function
		TRIDC7BG048390	544755322	544758697	protein N-terminal asparagine amidohydrolase family protein
		TRIDC7BG048400	544769381	544770451	Zinc finger CCCH domain-containing protein 14
		TRIDC7BG048410	544771227	544774649	Nse4, component of Smc5/6 DNA repair complex
		TRIDC7BG048420	545345355	545347595	Ribose-phosphate pyrophosphokinase 1
		TRIDC7BG072680	731293480	731295677	12S seed storage globulin 1
		TRIDC7BG072690	731467389	731470692	26S protease regulatory subunit 8
		TRIDC7BG072700	731501664	731502434	Cytochrome P450 superfamily protein
		TRIDC7BG072710	731528180	731529101	expansin-like A2
		TRIDC7BG072720	731529012	731529693	undescribed protein
		TRIDC7BG072730	731532862	731534014	expansin-like A2
		TRIDC7BG072740	731533742	731534368	undescribed protein
		TRIDC7BG072750	731604824	731606695	NADH dehydrogenase [ubiquinone] 1 beta subcomplex subunit 2
		TRIDC7BG072760	731608443	731609470	undescribed protein
		TRIDC7BG072770	731611564	731612276	unknown function
		TRIDC7BG072780	731612499	731613015	undescribed protein
		TRIDC7BG072790	731613182	731614306	unknown function
		TRIDC7BG072800	731614525	731614829	undescribed protein
		TRIDC7BG072810	731634888	731635941	undescribed protein
		TRIDC7BG072820	731646311	731647173	Mediator of RNA polymerase II transcription subunit 19a
		TRIDC7BG072830	731765030	731765358	undescribed protein
		TRIDC7BG072840	732213910	732214815	Arabidopsis protein of unknown function (DUF241)
		TRIDC7BG072850	732281862	732282151	undescribed protein
		TRIDC7BG072860	732400568	732401479	unknown function
		TRIDC7BG072870	732423784	732425066	BTB/POZ domain-containing protein
		TRIDC7BG072880	732451985	732453846	undescribed protein
		TRIDC7BG072890	732631061	732632873	undescribed protein
		TRIDC7BG072900	732899208	732899970	Cytochrome P450 superfamily protein
		TRIDC7BG072910	732907599	732910960	undescribed protein
		TRIDC7BG072920	732989492	732990107	NADH-ubiquinone oxidoreductase chain 6
		TRIDC7BG072930	733097901	733098258	undescribed protein
		TRIDC7BG072940	733098707	733100187	undescribed protein
		TRIDC7BG072950	733098707	733100360	undescribed protein
		TRIDC7BG072960	733188746	733189032	undescribed protein
		TRIDC7BG072970	733269979	733270600	F-box/LRR-repeat protein 14
		TRIDC7BG072980	733287944	733288636	undescribed protein
		TRIDC7BG072990	733308337	733309795	F-box/LRR-repeat protein 14
		TRIDC7BG073000	733345287	733346745	F-box/LRR-repeat protein 14
		TRIDC7BG073010	733389325	733390030	unknown function
		TRIDC7BG073020	733514644	733515267	undescribed protein
		TRIDC7BG073030	733575619	733576404	Chitinase family protein
		TRIDC7BG073040	733655872	733656544	Chitinase family protein
		TRIDC7BG073050	733680996	733682246	ATP-dependent zinc metalloprotease FtsH 3
		TRIDC7BG073060	733688702	733689514	unknown function
		TRIDC7BG073070	733860435	733861034	Protein of unknown function (DUF1218)
		TRIDC7BG073080	733925095	733926229	Chitinase family protein
		TRIDC7BG073090	734014324	734014794	undescribed protein
		TRIDC7BG073100	734107343	734113024	1,4-alpha-glucan branching enzyme GlgB
RAC875_c34012_983				734184474
		TRIDC7BG073110	734193499	734194405	NAC domain containing protein 36
		TRIDC7BG073120	734301850	734303263	Transmembrane protein 184C
		TRIDC7BG073130	734392803	734394435	Cyclin B2;3
		TRIDC7BG073140	734521395	734522934	unknown function
		TRIDC7BG073150	734978789	734979113	undescribed protein
		TRIDC7BG073160	735238909	735247990	undescribed protein
		TRIDC7BG073170	735287192	735287490	undescribed protein
		TRIDC7BG073180	735287588	735291062	Insulinase (Peptidase family M16) family protein
		TRIDC7BG073190	735297033	735306632	undescribed protein
		TRIDC7BG073200	735317619	735319851	U-box domain-containing protein 15
		TRIDC7BG073210	735324369	735325140	undescribed protein
		TRIDC7BG073220	735352320	735354155	undescribed protein
		TRIDC7BG073230	735356355	735357416	unknown function
		TRIDC7BG073240	735492283	735494254	catalase 2

## Sheet: Table_S6
Table S6 Rankings of the 79 genotypes for the accumulation of total immunogenic (IPT) and total toxic (TPT) CD-related peptides in the two growing seasons. Any two means having a common letter, are not significantly different based on Duncan's multiple range test (DMRT, p<0.05).
Rank	Genotype	IPT.16	DMRT	Genotype	IPT.17	DMRT	Genotype	TPT.16	DMRT	Genotype	TPT.17	DMRT
1	Valerio	360.4	a	Simeto	1108	a	Valerio	16.62	a	Simeto	266.4	a
2	Messapia	410.1	ab	Iride	1112	a	Provenzal	17.22	a	Provenzal	346.6	ab
3	Provenzal	422.8	ab	Duilio	1250	ab	Messapia	22.13	ab	Iride	367.2	abc
4	PR22D89	424.9	ab	Vesuvio	1253	abc	Simeto	26.6	abc	Vesuvio	374.6	abcd
5	San-Carlo	437.6	abc	Granizo	1258	abc	PR22D89	27.12	abcd	Duilio	396.5	abcde
6	Arcobaleno	447.1	abcd	Giotto	1308	abcd	Varano	29.73	abcde	Claudio	397.3	abcde
7	Svevo	470.5	abcde	Claudio	1309	abcd	Primadur	31.64	bcdef	Granizo	411.9	bcdef
8	Maestrale	474.1	abcde	Vitromax	1323	abcde	San-Carlo	32.79	bcdefg	Giotto	420.1	bcdefg
9	Saragolla	476.5	abcde	Meridiano	1399	abcdef	Svevo	35.08	bcdefgh	Adamello	432.5	bcdefgh
10	Primadur	559.8	bcdef	Provenzal	1415	abcdef	Saragolla	36.86	cdefghi	Dylan	435.4	bcdefghi
11	West-Bread-881	561.2	bcdefg	Svevo	1432	abcdefg	Maestrale	37.11	cdefghi	Ofanto	448.8	bcdefghi
12	Pedroso	568.7	bcdefgh	Arcobaleno	1457	abcdefgh	Vitromax	38.35	cdefghij	Vitromax	462.4	bcdefghij
13	Orfeo	584.1	bcdefgh	Avispa	1508	bcdefghi	Ofanto	39.11	cdefghijk	Achille	465.2	bcdefghijk
14	Simeto	615	cdefghi	Altar.84	1516	bcdefghi	Vesuvio	40.58	cdefghijk	Virgilio	486.9	bcdefghijkl
15	Varano	619.5	defghij	Virgilio	1526	bcdefghi	Platini	41.2	defghijkl	Arcobaleno	494.4	cdefghijklm
16	Tirex	634.3	efghij	Grazia	1533	bcdefghij	West-Bread-881	41.21	defghijkl	Chiara	516.5	defghijklmn
17	PI94749	646.2	efghijk	Dylan	1540	bcdefghijk	Arcobaleno	41.92	efghijkl	Grazia	519.8	efghijklmno
18	Biensur	665.1	fghijk	Primadur	1541	bcdefghijk	Chiara	42.06	efghijkl	Valerio	520.7	efghijklmno
19	Chiara	668.3	fghijk	Saadi	1582	bcdefghijkl	Kofa	42.42	efghijklm	Amedeo	536.5	efghijklmnop
20	Claudio	676.1	fghijkl	Orfeo	1586	bcdefghijklm	Neolatino	43.56	efghijklmn	Svevo	542.5	fghijklmnop
21	Orobel	689.1	fghijklm	K26	1639	cdefghijklmn	Pedroso	45.55	fghijklmno	K26	550.1	fghijklmnopq
22	Rusticano	689.2	fghijklm	Biensur	1649	defghijklmn	Mimmo	46.36	ghijklmnop	Orobel	550.6	fghijklmnopq
23	Vitromax	694.5	fghijklmn	Colosseo	1666	defghijklmno	Baio	48.2	hijklmnopq	Meridiano	551.4	fghijklmnopq
24	Kofa	724.2	fghijklmno	Kronos	1671	defghijklmno	Appulo	48.76	hijklmnopq	Fortore	565.7	ghijklmnopqr
25	Nefer	727.3	fghijklmno	Tirex	1687	defghijklmno	Karalis	48.96	hijklmnopq	Messapia	570.2	hijklmnopqr
26	Valnova	740.4	fghijklmnop	Chiara	1707	efghijklmnop	Nefer	49.17	hijklmnopq	Colosseo	570.6	hijklmnopqr
27	Platini	746	ghijklmnopq	Achille	1729	fghijklmnopq	Orobel	50.34	ijklmnopqr	Avispa	571.2	hijklmnopqr
28	Tablur	750.4	hijklmnopq	Orobel	1744	fghijklmnopqr	Achille	51	ijklmnopqr	Tresor	579.5	ijklmnopqrs
29	UC113	787.5	ijklmnopqr	Fortore	1746	fghijklmnopqr	Orfeo	51.47	ijklmnopqr	Neodur	605.2	jklmnopqrst
30	K26	794	ijklmnopqr	Tiziana	1776	fghijklmnopqrs	Valnova	52.53	jklmnopqrs	Ancomarzio	608.9	klmnopqrstu
31	Altar.84	800.8	jklmnopqrs	Cosmodur	1783	fghijklmnopqrs	Creso	52.78	jklmnopqrs	Biensur	618.1	lmnopqrstuv
32	Tiziana	805	jklmnopqrs	Latinur	1809	ghijklmnopqrst	Levante	53.08	klmnopqrs	Grecale	635	mnopqrstuvw
33	Tresor	820.4	klmnopqrst	Casanova	1809	ghijklmnopqrst	Dylan	53.15	klmnopqrs	Trinakria	638.8	mnopqrstuvwx
34	Avispa	853	lmnopqrstu	Grecale	1810	ghijklmnopqrst	K26	55.81	lmnopqrst	Orfeo	642	nopqrstuvwx
35	Karalis	860.8	mnopqrstu	Neodur	1840	hijklmnopqrstu	Neodur	56.87	mnopqrst	Neolatino	643.6	nopqrstuvwx
36	Mimmo	863.7	mnopqrstu	Ofanto	1856	ijklmnopqrstu	Tirex	57.28	nopqrst	PI94749	649.8	nopqrstuvwx
37	Appulo	864.8	mnopqrstu	Ancomarzio	1859	ijklmnopqrstu	Tablur	58.02	nopqrst	Primadur	649.8	nopqrstuvwx
38	Baio	876.5	nopqrstuv	Saragolla	1862	ijklmnopqrstu	Adamello	58.5	opqrst	Valnova	649.8	nopqrstuvwx
39	Lesina	883.4	opqrstuv	PI94749	1868	ijklmnopqrstuv	Lesina	59.64	opqrstu	Saadi	650.3	nopqrstuvwx
40	Cirillo	886.8	opqrstuv	UC113	1868	ijklmnopqrstuv	Biensur	59.9	opqrstu	Karalis	652.6	nopqrstuvwx
41	Preco	891.2	opqrstuv	Valnova	1868	ijklmnopqrstuv	Normanno	60.33	pqrstu	Ciccio	654.1	nopqrstuvwx
42	Langdon	919.4	pqrstuvw	Normanno	1923	jklmnopqrstuvw	Meridiano	61.38	qrstuv	Casanova	655.8	nopqrstuvwxy
43	Meridiano	920.9	pqrstuvw	Italo	1929	klmnopqrstuvw	Claudio	62	qrstuv	Lesina	656.1	nopqrstuvwxy
44	Creso	927.1	qrstuvw	Pedroso	1947	lmnopqrstuvw	Lloyd	62.89	qrstuv	Levante	660.5	nopqrstuvwxy
45	Ofanto	929.3	qrstuvw	Adamello	1974	lmnopqrstuvwx	Cirillo	64.36	rstuvw	Cappelli	664.6	nopqrstuvwxyz
46	Iride	963	rstuvwx	Platini	1979	mnopqrstuvwx	Granizo	64.36	rstuvw	Tiziana	665.3	nopqrstuvwxyz
47	Vesuvio	964.4	rstuvwx	Preco	2006	nopqrstuvwxy	Kronos	64.36	rstuvw	Platini	666.3	opqrstuvwxyz
48	Neolatino	966.6	rstuvwx	Amedeo	2009	nopqrstuvwxy	Latinur	64.36	rstuvw	Latino	667.2	opqrstuvwxyz
49	Cosmodur	973.9	rstuvwxy	Cirillo	2014	nopqrstuvwxy	Iride	64.41	rstuvw	Appulo	685.2	pqrstuvwxyz
50	Granizo	981.6	stuvwxyz	Messapia	2017	nopqrstuvwxy	Tiziana	64.63	rstuvw	Mimmo	692.2	qrstuvwxyz
51	Casanova	985.4	stuvwxyz	Mimmo	2018	nopqrstuvwxy	PI94749	66.5	stuvwx	Varano	693.4	qrstuvwxyz
52	Normanno	1002.1	tuvwxyzA	Levante	2035	nopqrstuvwxy	Cosmodur	67.94	tuvwx	Latinur	698.2	qrstuvwxyzA
53	Achille	1032.7	uvwxyzAB	Langdon	2049	opqrstuvwxy	Rusticano	69.93	tuvwx	Tirex	700.8	rstuvwxyzA
54	Ariosto	1057.5	vwxyzABC	Neolatino	2050	opqrstuvwxy	Capeiti.8	73.75	uvwxy	West-Bread-881	713.1	rstuvwxyzAB
55	Duilio	1059.5	vwxyzABC	San-Carlo	2054	opqrstuvwxy	Tresor	75.49	vwxyz	Baio	724.2	stuvwxyzABC
56	Grazia	1059.5	vwxyzABC	Cappelli	2062	opqrstuvwxy	Casanova	77.76	wxyzA	PR22D89	730.1	tuvwxyzABC
57	Levante	1060.7	vwxyzABC	Varano	2087	pqrstuvwxy	Grecale	78.71	xyzAB	Cosmodur	735.3	tuvwxyzABCD
58	Latinur	1082.5	wxyzABCD	PR22D89	2104	pqrstuvwxy	Altar.84	83.5	yzABC	Normanno	737.8	tuvwxyzABCD
59	Saadi	1085.4	wxyzABCD	Latino	2106	qrstuvwxy	UC113	83.63	yzABC	Cirillo	748.1	tuvwxyzABCDE
60	Aureo	1089.6	wxyzABCD	Karalis	2134	rstuvwxyz	Preco	85.77	yzABCD	Saragolla	755.2	uvwxyzABCDE
61	Dylan	1095.4	wxyzABCD	Baio	2149	stuvwxyz	Grazia	85.88	yzABCD	Altar.84	757.2	uvwxyzABCDE
62	Appio	1103.9	wxyzABCDE	Ciccio	2153	stuvwxyz	Aureo	88.32	zABCDE	Italo	761.5	vwxyzABCDE
63	Giotto	1120	xyzABCDEF	Lesina	2154	stuvwxyz	Latino	88.65	zABCDE	Kronos	770.1	wxyzABCDEF
64	Latino	1144.2	xyzABCDEF	Tresor	2182	tuvwxyz	Giotto	89.48	zABCDE	Appio	778.6	wxyzABCDEF
65	Virgilio	1145.9	xyzABCDEF	Valerio	2187	tuvwxyz	Ciccio	89.61	zABCDE	Tablur	783	wxyzABCDEF
66	Neodur	1153.9	yzABCDEF	Nefer	2188	tuvwxyz	Ancomarzio	90.53	ABCDE	San-Carlo	787.5	xyzABCDEF
67	Lloyd	1167.1	zABCDEF	Kofa	2217	uvwxyz	Avispa	91.01	ABCDE	Capeiti.8	802.9	yzABCDEFG
68	Ancomarzio	1182.9	ABCDEF	Rusticano	2222	uvwxyz	Langdon	91.55	ABCDE	Pedroso	809	zABCDEFG
69	Trinakria	1208.3	BCDEFG	Maestrale	2224	uvwxyz	Trinakria	91.79	ABCDE	UC113	840.9	ABCDEFG
70	Ciccio	1209.3	BCDEFG	Lloyd	2233	uvwxyz	Italo	92.38	BCDE	Creso	858.6	BCDEFGH
71	Italo	1238	CDEFGH	Trinakria	2260	vwxyz	Amedeo	96.68	CDEF	Lloyd	864.1	CDEFGH
72	Kronos	1238.2	CDEFGHI	Tablur	2270	wxyz	Fortore	98.04	DEF	Kofa	864.5	CDEFGH
73	Adamello	1248	DEFGHIJ	West-Bread-881	2354	xyzA	Duilio	99.22	DEF	Rusticano	876.6	DEFGH
74	Fortore	1279.8	EFGHIJ	Creso	2369	xyzA	Ariosto	100.38	EF	Langdon	891	EFGHI
75	Grecale	1295.8	FGHIJ	Appulo	2382	yzA	Virgilio	107.96	FG	Preco	912.4	FGHI
76	Cappelli	1362.6	GHIJK	Appio	2382	yzA	Appio	113.03	GH	Aureo	933.1	GHI
77	Colosseo	1399.4	HIJK	Aureo	2518	zAB	Saadi	113.9	GH	Nefer	985.9	HI
78	Capeiti.8	1413.5	HJK	Ariosto	2634	AB	Cappelli	125.53	H	Maestrale	1013.8	I
79	Amedeo	1517.5	K	Capeiti.8	2776	B	Colosseo	193.63	I	Ariosto	1144.7	J
